# Supplementary material
Source: publisher figshare collection journal article supplement (https://gsajournals.figshare.com/ndownloader/files/26554178)
Supplement: Supplementary file 1 [file 26554178]

## Sheet: Sheet1
Geno	Test	Fst	Ancestries	Theta	Depth	PCs	Threshold	Count	Total	Proportion
GT	RUTH-LRT	0.01	1	0.001	30	2	0.05	3070	50000	0.0614
GT	RUTH-LRT	0.01	1	0.001	30	2	0.01	668	50000	0.01336
GT	RUTH-LRT	0.01	1	0.001	30	2	0.001	70	50000	0.0014
GT	RUTH-LRT	0.01	1	0.001	30	2	0.0001	8	50000	0.00016
GT	RUTH-LRT	0.01	1	0.001	30	2	1e-05	0	50000	0
GT	RUTH-LRT	0.01	1	0.001	30	2	1e-06	0	50000	0
GT	RUTH-LRT	0.01	1	0.001	30	2	1e-07	0	50000	0
GT	RUTH-LRT	0.01	1	0.001	30	2	1e-08	0	50000	0
GT	RUTH-LRT	0.01	1	-0.001	5	2	0.05	24360	50000	0.4872
GT	RUTH-LRT	0.01	1	-0.001	5	2	0.01	14843	50000	0.29686
GT	RUTH-LRT	0.01	1	-0.001	5	2	0.001	6697	50000	0.13394
GT	RUTH-LRT	0.01	1	-0.001	5	2	0.0001	2679	50000	0.05358
GT	RUTH-LRT	0.01	1	-0.001	5	2	1e-05	986	50000	0.01972
GT	RUTH-LRT	0.01	1	-0.001	5	2	1e-06	343	50000	0.00686
GT	RUTH-LRT	0.01	1	-0.001	5	2	1e-07	111	50000	0.00222
GT	RUTH-LRT	0.01	1	-0.001	5	2	1e-08	37	50000	0.00074
GL	RUTH-LRT	0.01	1	0.001	30	2	0.05	2536	50000	0.05072
GL	RUTH-LRT	0.01	1	0.001	30	2	0.01	518	50000	0.01036
GL	RUTH-LRT	0.01	1	0.001	30	2	0.001	58	50000	0.00116
GL	RUTH-LRT	0.01	1	0.001	30	2	0.0001	2	50000	4e-05
GL	RUTH-LRT	0.01	1	0.001	30	2	1e-05	1	50000	2e-05
GL	RUTH-LRT	0.01	1	0.001	30	2	1e-06	0	50000	0
GL	RUTH-LRT	0.01	1	0.001	30	2	1e-07	0	50000	0
GL	RUTH-LRT	0.01	1	0.001	30	2	1e-08	0	50000	0
GT	RUTH-Score	0.01	1	-0.001	30	2	0.05	3741	50000	0.07482
GT	RUTH-Score	0.01	1	-0.001	30	2	0.01	1031	50000	0.02062
GT	RUTH-Score	0.01	1	-0.001	30	2	0.001	205	50000	0.0041
GT	RUTH-Score	0.01	1	-0.001	30	2	0.0001	37	50000	0.00074
GT	RUTH-Score	0.01	1	-0.001	30	2	1e-05	9	50000	0.00018
GT	RUTH-Score	0.01	1	-0.001	30	2	1e-06	3	50000	6e-05
GT	RUTH-Score	0.01	1	-0.001	30	2	1e-07	0	50000	0
GT	RUTH-Score	0.01	1	-0.001	30	2	1e-08	0	50000	0
GT	RUTH-Score	0.01	1	0.001	30	2	0.05	3217	50000	0.06434
GT	RUTH-Score	0.01	1	0.001	30	2	0.01	836	50000	0.01672
GT	RUTH-Score	0.01	1	0.001	30	2	0.001	129	50000	0.00258
GT	RUTH-Score	0.01	1	0.001	30	2	0.0001	30	50000	0.0006
GT	RUTH-Score	0.01	1	0.001	30	2	1e-05	6	50000	0.00012
GT	RUTH-Score	0.01	1	0.001	30	2	1e-06	2	50000	4e-05
GT	RUTH-Score	0.01	1	0.001	30	2	1e-07	0	50000	0
GT	RUTH-Score	0.01	1	0.001	30	2	1e-08	0	50000	0
GL	RUTH-Score	0.01	1	-0.001	30	2	0.05	2470	50000	0.0494
GL	RUTH-Score	0.01	1	-0.001	30	2	0.01	539	50000	0.01078
GL	RUTH-Score	0.01	1	-0.001	30	2	0.001	80	50000	0.0016
GL	RUTH-Score	0.01	1	-0.001	30	2	0.0001	12	50000	0.00024
GL	RUTH-Score	0.01	1	-0.001	30	2	1e-05	0	50000	0
GL	RUTH-Score	0.01	1	-0.001	30	2	1e-06	0	50000	0
GL	RUTH-Score	0.01	1	-0.001	30	2	1e-07	0	50000	0
GL	RUTH-Score	0.01	1	-0.001	30	2	1e-08	0	50000	0
GL	RUTH-Score	0.01	1	0.001	30	2	0.05	2433	50000	0.04866
GL	RUTH-Score	0.01	1	0.001	30	2	0.01	504	50000	0.01008
GL	RUTH-Score	0.01	1	0.001	30	2	0.001	63	50000	0.00126
GL	RUTH-Score	0.01	1	0.001	30	2	0.0001	4	50000	8e-05
GL	RUTH-Score	0.01	1	0.001	30	2	1e-05	2	50000	4e-05
GL	RUTH-Score	0.01	1	0.001	30	2	1e-06	1	50000	2e-05
GL	RUTH-Score	0.01	1	0.001	30	2	1e-07	0	50000	0
GL	RUTH-Score	0.01	1	0.001	30	2	1e-08	0	50000	0
GT	RUTH-LRT	0.01	1	0.001	5	2	0.05	24709	50000	0.49418
GT	RUTH-LRT	0.01	1	0.001	5	2	0.01	15646	50000	0.31292
GT	RUTH-LRT	0.01	1	0.001	5	2	0.001	7285	50000	0.1457
GT	RUTH-LRT	0.01	1	0.001	5	2	0.0001	3076	50000	0.06152
GT	RUTH-LRT	0.01	1	0.001	5	2	1e-05	1160	50000	0.0232
GT	RUTH-LRT	0.01	1	0.001	5	2	1e-06	424	50000	0.00848
GT	RUTH-LRT	0.01	1	0.001	5	2	1e-07	127	50000	0.00254
GT	RUTH-LRT	0.01	1	0.001	5	2	1e-08	44	50000	0.00088
GT	RUTH-LRT	0.01	1	-0.002	30	2	0.05	3679	50000	0.07358
GT	RUTH-LRT	0.01	1	-0.002	30	2	0.01	890	50000	0.0178
GT	RUTH-LRT	0.01	1	-0.002	30	2	0.001	96	50000	0.00192
GT	RUTH-LRT	0.01	1	-0.002	30	2	0.0001	12	50000	0.00024
GT	RUTH-LRT	0.01	1	-0.002	30	2	1e-05	2	50000	4e-05
GT	RUTH-LRT	0.01	1	-0.002	30	2	1e-06	0	50000	0
GT	RUTH-LRT	0.01	1	-0.002	30	2	1e-07	0	50000	0
GT	RUTH-LRT	0.01	1	-0.002	30	2	1e-08	0	50000	0
GL	RUTH-LRT	0.01	1	-0.001	5	2	0.05	2535	50000	0.0507
GL	RUTH-LRT	0.01	1	-0.001	5	2	0.01	514	50000	0.01028
GL	RUTH-LRT	0.01	1	-0.001	5	2	0.001	49	50000	0.00098
GL	RUTH-LRT	0.01	1	-0.001	5	2	0.0001	6	50000	0.00012
GL	RUTH-LRT	0.01	1	-0.001	5	2	1e-05	0	50000	0
GL	RUTH-LRT	0.01	1	-0.001	5	2	1e-06	0	50000	0
GL	RUTH-LRT	0.01	1	-0.001	5	2	1e-07	0	50000	0
GL	RUTH-LRT	0.01	1	-0.001	5	2	1e-08	0	50000	0
GL	RUTH-LRT	0.01	1	0.001	5	2	0.05	2793	50000	0.05586
GL	RUTH-LRT	0.01	1	0.001	5	2	0.01	612	50000	0.01224
GL	RUTH-LRT	0.01	1	0.001	5	2	0.001	76	50000	0.00152
GL	RUTH-LRT	0.01	1	0.001	5	2	0.0001	13	50000	0.00026
GL	RUTH-LRT	0.01	1	0.001	5	2	1e-05	1	50000	2e-05
GL	RUTH-LRT	0.01	1	0.001	5	2	1e-06	1	50000	2e-05
GL	RUTH-LRT	0.01	1	0.001	5	2	1e-07	0	50000	0
GL	RUTH-LRT	0.01	1	0.001	5	2	1e-08	0	50000	0
GT	RUTH-Score	0.01	1	-0.001	5	2	0.05	24603	50000	0.49206
GT	RUTH-Score	0.01	1	-0.001	5	2	0.01	15269	50000	0.30538
GT	RUTH-Score	0.01	1	-0.001	5	2	0.001	7043	50000	0.14086
GT	RUTH-Score	0.01	1	-0.001	5	2	0.0001	2844	50000	0.05688
GT	RUTH-Score	0.01	1	-0.001	5	2	1e-05	1086	50000	0.02172
GT	RUTH-Score	0.01	1	-0.001	5	2	1e-06	399	50000	0.00798
GT	RUTH-Score	0.01	1	-0.001	5	2	1e-07	147	50000	0.00294
GT	RUTH-Score	0.01	1	-0.001	5	2	1e-08	60	50000	0.0012
GT	RUTH-Score	0.01	1	0.001	5	2	0.05	24973	50000	0.49946
GT	RUTH-Score	0.01	1	0.001	5	2	0.01	16040	50000	0.3208
GT	RUTH-Score	0.01	1	0.001	5	2	0.001	7527	50000	0.15054
GT	RUTH-Score	0.01	1	0.001	5	2	0.0001	3170	50000	0.0634
GT	RUTH-Score	0.01	1	0.001	5	2	1e-05	1175	50000	0.0235
GT	RUTH-Score	0.01	1	0.001	5	2	1e-06	427	50000	0.00854
GT	RUTH-Score	0.01	1	0.001	5	2	1e-07	130	50000	0.0026
GT	RUTH-Score	0.01	1	0.001	5	2	1e-08	48	50000	0.00096
GL	RUTH-Score	0.01	1	-0.001	5	2	0.05	2357	50000	0.04714
GL	RUTH-Score	0.01	1	-0.001	5	2	0.01	475	50000	0.0095
GL	RUTH-Score	0.01	1	-0.001	5	2	0.001	44	50000	0.00088
GL	RUTH-Score	0.01	1	-0.001	5	2	0.0001	2	50000	4e-05
GL	RUTH-Score	0.01	1	-0.001	5	2	1e-05	0	50000	0
GL	RUTH-Score	0.01	1	-0.001	5	2	1e-06	0	50000	0
GL	RUTH-Score	0.01	1	-0.001	5	2	1e-07	0	50000	0
GL	RUTH-Score	0.01	1	-0.001	5	2	1e-08	0	50000	0
GL	RUTH-Score	0.01	1	0.001	5	2	0.05	2535	50000	0.0507
GL	RUTH-Score	0.01	1	0.001	5	2	0.01	546	50000	0.01092
GL	RUTH-Score	0.01	1	0.001	5	2	0.001	69	50000	0.00138
GL	RUTH-Score	0.01	1	0.001	5	2	0.0001	11	50000	0.00022
GL	RUTH-Score	0.01	1	0.001	5	2	1e-05	2	50000	4e-05
GL	RUTH-Score	0.01	1	0.001	5	2	1e-06	1	50000	2e-05
GL	RUTH-Score	0.01	1	0.001	5	2	1e-07	0	50000	0
GL	RUTH-Score	0.01	1	0.001	5	2	1e-08	0	50000	0
GT	RUTH-LRT	0.01	1	0.002	30	2	0.05	2944	50000	0.05888
GT	RUTH-LRT	0.01	1	0.002	30	2	0.01	646	50000	0.01292
GT	RUTH-LRT	0.01	1	0.002	30	2	0.001	56	50000	0.00112
GT	RUTH-LRT	0.01	1	0.002	30	2	0.0001	4	50000	8e-05
GT	RUTH-LRT	0.01	1	0.002	30	2	1e-05	0	50000	0
GT	RUTH-LRT	0.01	1	0.002	30	2	1e-06	0	50000	0
GT	RUTH-LRT	0.01	1	0.002	30	2	1e-07	0	50000	0
GT	RUTH-LRT	0.01	1	0.002	30	2	1e-08	0	50000	0
GT	RUTH-LRT	0.01	1	-0.002	5	2	0.05	24095	50000	0.4819
GT	RUTH-LRT	0.01	1	-0.002	5	2	0.01	14740	50000	0.2948
GT	RUTH-LRT	0.01	1	-0.002	5	2	0.001	6469	50000	0.12938
GT	RUTH-LRT	0.01	1	-0.002	5	2	0.0001	2528	50000	0.05056
GT	RUTH-LRT	0.01	1	-0.002	5	2	1e-05	877	50000	0.01754
GT	RUTH-LRT	0.01	1	-0.002	5	2	1e-06	297	50000	0.00594
GT	RUTH-LRT	0.01	1	-0.002	5	2	1e-07	95	50000	0.0019
GT	RUTH-LRT	0.01	1	-0.002	5	2	1e-08	27	50000	0.00054
GL	RUTH-LRT	0.01	1	-0.002	30	2	0.05	2449	50000	0.04898
GL	RUTH-LRT	0.01	1	-0.002	30	2	0.01	478	50000	0.00956
GL	RUTH-LRT	0.01	1	-0.002	30	2	0.001	33	50000	0.00066
GL	RUTH-LRT	0.01	1	-0.002	30	2	0.0001	3	50000	6e-05
GL	RUTH-LRT	0.01	1	-0.002	30	2	1e-05	0	50000	0
GL	RUTH-LRT	0.01	1	-0.002	30	2	1e-06	0	50000	0
GL	RUTH-LRT	0.01	1	-0.002	30	2	1e-07	0	50000	0
GL	RUTH-LRT	0.01	1	-0.002	30	2	1e-08	0	50000	0
GL	RUTH-LRT	0.01	1	0.002	30	2	0.05	2661	50000	0.05322
GL	RUTH-LRT	0.01	1	0.002	30	2	0.01	546	50000	0.01092
GL	RUTH-LRT	0.01	1	0.002	30	2	0.001	51	50000	0.00102
GL	RUTH-LRT	0.01	1	0.002	30	2	0.0001	7	50000	0.00014
GL	RUTH-LRT	0.01	1	0.002	30	2	1e-05	1	50000	2e-05
GL	RUTH-LRT	0.01	1	0.002	30	2	1e-06	0	50000	0
GL	RUTH-LRT	0.01	1	0.002	30	2	1e-07	0	50000	0
GL	RUTH-LRT	0.01	1	0.002	30	2	1e-08	0	50000	0
GT	RUTH-Score	0.01	1	-0.002	30	2	0.05	3981	50000	0.07962
GT	RUTH-Score	0.01	1	-0.002	30	2	0.01	1143	50000	0.02286
GT	RUTH-Score	0.01	1	-0.002	30	2	0.001	202	50000	0.00404
GT	RUTH-Score	0.01	1	-0.002	30	2	0.0001	45	50000	0.0009
GT	RUTH-Score	0.01	1	-0.002	30	2	1e-05	14	50000	0.00028
GT	RUTH-Score	0.01	1	-0.002	30	2	1e-06	3	50000	6e-05
GT	RUTH-Score	0.01	1	-0.002	30	2	1e-07	0	50000	0
GT	RUTH-Score	0.01	1	-0.002	30	2	1e-08	0	50000	0
GT	RUTH-Score	0.01	1	0.002	30	2	0.05	3083	50000	0.06166
GT	RUTH-Score	0.01	1	0.002	30	2	0.01	822	50000	0.01644
GT	RUTH-Score	0.01	1	0.002	30	2	0.001	112	50000	0.00224
GT	RUTH-Score	0.01	1	0.002	30	2	0.0001	20	50000	0.0004
GT	RUTH-Score	0.01	1	0.002	30	2	1e-05	3	50000	6e-05
GT	RUTH-Score	0.01	1	0.002	30	2	1e-06	1	50000	2e-05
GT	RUTH-Score	0.01	1	0.002	30	2	1e-07	0	50000	0
GT	RUTH-Score	0.01	1	0.002	30	2	1e-08	0	50000	0
GL	RUTH-Score	0.01	1	-0.002	30	2	0.05	2469	50000	0.04938
GL	RUTH-Score	0.01	1	-0.002	30	2	0.01	544	50000	0.01088
GL	RUTH-Score	0.01	1	-0.002	30	2	0.001	64	50000	0.00128
GL	RUTH-Score	0.01	1	-0.002	30	2	0.0001	15	50000	0.0003
GL	RUTH-Score	0.01	1	-0.002	30	2	1e-05	4	50000	8e-05
GL	RUTH-Score	0.01	1	-0.002	30	2	1e-06	2	50000	4e-05
GL	RUTH-Score	0.01	1	-0.002	30	2	1e-07	0	50000	0
GL	RUTH-Score	0.01	1	-0.002	30	2	1e-08	0	50000	0
GL	RUTH-Score	0.01	1	0.002	30	2	0.05	2461	50000	0.04922
GL	RUTH-Score	0.01	1	0.002	30	2	0.01	516	50000	0.01032
GL	RUTH-Score	0.01	1	0.002	30	2	0.001	58	50000	0.00116
GL	RUTH-Score	0.01	1	0.002	30	2	0.0001	8	50000	0.00016
GL	RUTH-Score	0.01	1	0.002	30	2	1e-05	1	50000	2e-05
GL	RUTH-Score	0.01	1	0.002	30	2	1e-06	0	50000	0
GL	RUTH-Score	0.01	1	0.002	30	2	1e-07	0	50000	0
GL	RUTH-Score	0.01	1	0.002	30	2	1e-08	0	50000	0
GT	RUTH-LRT	0.01	1	0.002	5	2	0.05	25053	50000	0.50106
GT	RUTH-LRT	0.01	1	0.002	5	2	0.01	15913	50000	0.31826
GT	RUTH-LRT	0.01	1	0.002	5	2	0.001	7539	50000	0.15078
GT	RUTH-LRT	0.01	1	0.002	5	2	0.0001	3293	50000	0.06586
GT	RUTH-LRT	0.01	1	0.002	5	2	1e-05	1238	50000	0.02476
GT	RUTH-LRT	0.01	1	0.002	5	2	1e-06	431	50000	0.00862
GT	RUTH-LRT	0.01	1	0.002	5	2	1e-07	134	50000	0.00268
GT	RUTH-LRT	0.01	1	0.002	5	2	1e-08	44	50000	0.00088
GT	RUTH-LRT	0.01	1	-0.005	30	2	0.05	4840	50000	0.0968
GT	RUTH-LRT	0.01	1	-0.005	30	2	0.01	1358	50000	0.02716
GT	RUTH-LRT	0.01	1	-0.005	30	2	0.001	222	50000	0.00444
GT	RUTH-LRT	0.01	1	-0.005	30	2	0.0001	27	50000	0.00054
GT	RUTH-LRT	0.01	1	-0.005	30	2	1e-05	4	50000	8e-05
GT	RUTH-LRT	0.01	1	-0.005	30	2	1e-06	1	50000	2e-05
GT	RUTH-LRT	0.01	1	-0.005	30	2	1e-07	0	50000	0
GT	RUTH-LRT	0.01	1	-0.005	30	2	1e-08	0	50000	0
GL	RUTH-LRT	0.01	1	-0.002	5	2	0.05	2428	50000	0.04856
GL	RUTH-LRT	0.01	1	-0.002	5	2	0.01	476	50000	0.00952
GL	RUTH-LRT	0.01	1	-0.002	5	2	0.001	45	50000	0.0009
GL	RUTH-LRT	0.01	1	-0.002	5	2	0.0001	2	50000	4e-05
GL	RUTH-LRT	0.01	1	-0.002	5	2	1e-05	0	50000	0
GL	RUTH-LRT	0.01	1	-0.002	5	2	1e-06	0	50000	0
GL	RUTH-LRT	0.01	1	-0.002	5	2	1e-07	0	50000	0
GL	RUTH-LRT	0.01	1	-0.002	5	2	1e-08	0	50000	0
GL	RUTH-LRT	0.01	1	0.002	5	2	0.05	3027	50000	0.06054
GL	RUTH-LRT	0.01	1	0.002	5	2	0.01	688	50000	0.01376
GL	RUTH-LRT	0.01	1	0.002	5	2	0.001	75	50000	0.0015
GL	RUTH-LRT	0.01	1	0.002	5	2	0.0001	13	50000	0.00026
GL	RUTH-LRT	0.01	1	0.002	5	2	1e-05	0	50000	0
GL	RUTH-LRT	0.01	1	0.002	5	2	1e-06	0	50000	0
GL	RUTH-LRT	0.01	1	0.002	5	2	1e-07	0	50000	0
GL	RUTH-LRT	0.01	1	0.002	5	2	1e-08	0	50000	0
GT	RUTH-Score	0.01	1	-0.002	5	2	0.05	24359	50000	0.48718
GT	RUTH-Score	0.01	1	-0.002	5	2	0.01	15207	50000	0.30414
GT	RUTH-Score	0.01	1	-0.002	5	2	0.001	6876	50000	0.13752
GT	RUTH-Score	0.01	1	-0.002	5	2	0.0001	2747	50000	0.05494
GT	RUTH-Score	0.01	1	-0.002	5	2	1e-05	979	50000	0.01958
GT	RUTH-Score	0.01	1	-0.002	5	2	1e-06	348	50000	0.00696
GT	RUTH-Score	0.01	1	-0.002	5	2	1e-07	126	50000	0.00252
GT	RUTH-Score	0.01	1	-0.002	5	2	1e-08	46	50000	0.00092
GT	RUTH-Score	0.01	1	0.002	5	2	0.05	25339	50000	0.50678
GT	RUTH-Score	0.01	1	0.002	5	2	0.01	16258	50000	0.32516
GT	RUTH-Score	0.01	1	0.002	5	2	0.001	7745	50000	0.1549
GT	RUTH-Score	0.01	1	0.002	5	2	0.0001	3376	50000	0.06752
GT	RUTH-Score	0.01	1	0.002	5	2	1e-05	1254	50000	0.02508
GT	RUTH-Score	0.01	1	0.002	5	2	1e-06	446	50000	0.00892
GT	RUTH-Score	0.01	1	0.002	5	2	1e-07	145	50000	0.0029
GT	RUTH-Score	0.01	1	0.002	5	2	1e-08	49	50000	0.00098
GL	RUTH-Score	0.01	1	-0.002	5	2	0.05	2256	50000	0.04512
GL	RUTH-Score	0.01	1	-0.002	5	2	0.01	448	50000	0.00896
GL	RUTH-Score	0.01	1	-0.002	5	2	0.001	45	50000	0.0009
GL	RUTH-Score	0.01	1	-0.002	5	2	0.0001	4	50000	8e-05
GL	RUTH-Score	0.01	1	-0.002	5	2	1e-05	0	50000	0
GL	RUTH-Score	0.01	1	-0.002	5	2	1e-06	0	50000	0
GL	RUTH-Score	0.01	1	-0.002	5	2	1e-07	0	50000	0
GL	RUTH-Score	0.01	1	-0.002	5	2	1e-08	0	50000	0
GL	RUTH-Score	0.01	1	0.002	5	2	0.05	2709	50000	0.05418
GL	RUTH-Score	0.01	1	0.002	5	2	0.01	583	50000	0.01166
GL	RUTH-Score	0.01	1	0.002	5	2	0.001	60	50000	0.0012
GL	RUTH-Score	0.01	1	0.002	5	2	0.0001	14	50000	0.00028
GL	RUTH-Score	0.01	1	0.002	5	2	1e-05	0	50000	0
GL	RUTH-Score	0.01	1	0.002	5	2	1e-06	0	50000	0
GL	RUTH-Score	0.01	1	0.002	5	2	1e-07	0	50000	0
GL	RUTH-Score	0.01	1	0.002	5	2	1e-08	0	50000	0
GT	RUTH-LRT	0.01	1	0.005	30	2	0.05	2819	50000	0.05638
GT	RUTH-LRT	0.01	1	0.005	30	2	0.01	641	50000	0.01282
GT	RUTH-LRT	0.01	1	0.005	30	2	0.001	66	50000	0.00132
GT	RUTH-LRT	0.01	1	0.005	30	2	0.0001	5	50000	0.0001
GT	RUTH-LRT	0.01	1	0.005	30	2	1e-05	0	50000	0
GT	RUTH-LRT	0.01	1	0.005	30	2	1e-06	0	50000	0
GT	RUTH-LRT	0.01	1	0.005	30	2	1e-07	0	50000	0
GT	RUTH-LRT	0.01	1	0.005	30	2	1e-08	0	50000	0
GT	RUTH-LRT	0.01	1	-0.005	5	2	0.05	23269	50000	0.46538
GT	RUTH-LRT	0.01	1	-0.005	5	2	0.01	13405	50000	0.2681
GT	RUTH-LRT	0.01	1	-0.005	5	2	0.001	5403	50000	0.10806
GT	RUTH-LRT	0.01	1	-0.005	5	2	0.0001	2035	50000	0.0407
GT	RUTH-LRT	0.01	1	-0.005	5	2	1e-05	687	50000	0.01374
GT	RUTH-LRT	0.01	1	-0.005	5	2	1e-06	230	50000	0.0046
GT	RUTH-LRT	0.01	1	-0.005	5	2	1e-07	74	50000	0.00148
GT	RUTH-LRT	0.01	1	-0.005	5	2	1e-08	26	50000	0.00052
GL	RUTH-LRT	0.01	1	-0.005	30	2	0.05	3027	50000	0.06054
GL	RUTH-LRT	0.01	1	-0.005	30	2	0.01	730	50000	0.0146
GL	RUTH-LRT	0.01	1	-0.005	30	2	0.001	79	50000	0.00158
GL	RUTH-LRT	0.01	1	-0.005	30	2	0.0001	10	50000	0.0002
GL	RUTH-LRT	0.01	1	-0.005	30	2	1e-05	2	50000	4e-05
GL	RUTH-LRT	0.01	1	-0.005	30	2	1e-06	0	50000	0
GL	RUTH-LRT	0.01	1	-0.005	30	2	1e-07	0	50000	0
GL	RUTH-LRT	0.01	1	-0.005	30	2	1e-08	0	50000	0
GL	RUTH-LRT	0.01	1	0.005	30	2	0.05	3175	50000	0.0635
GL	RUTH-LRT	0.01	1	0.005	30	2	0.01	738	50000	0.01476
GL	RUTH-LRT	0.01	1	0.005	30	2	0.001	74	50000	0.00148
GL	RUTH-LRT	0.01	1	0.005	30	2	0.0001	12	50000	0.00024
GL	RUTH-LRT	0.01	1	0.005	30	2	1e-05	0	50000	0
GL	RUTH-LRT	0.01	1	0.005	30	2	1e-06	0	50000	0
GL	RUTH-LRT	0.01	1	0.005	30	2	1e-07	0	50000	0
GL	RUTH-LRT	0.01	1	0.005	30	2	1e-08	0	50000	0
GT	RUTH-Score	0.01	1	-0.005	30	2	0.05	5204	50000	0.10408
GT	RUTH-Score	0.01	1	-0.005	30	2	0.01	1712	50000	0.03424
GT	RUTH-Score	0.01	1	-0.005	30	2	0.001	400	50000	0.008
GT	RUTH-Score	0.01	1	-0.005	30	2	0.0001	92	50000	0.00184
GT	RUTH-Score	0.01	1	-0.005	30	2	1e-05	28	50000	0.00056
GT	RUTH-Score	0.01	1	-0.005	30	2	1e-06	8	50000	0.00016
GT	RUTH-Score	0.01	1	-0.005	30	2	1e-07	4	50000	8e-05
GT	RUTH-Score	0.01	1	-0.005	30	2	1e-08	2	50000	4e-05
GT	RUTH-Score	0.01	1	0.005	30	2	0.05	2841	50000	0.05682
GT	RUTH-Score	0.01	1	0.005	30	2	0.01	717	50000	0.01434
GT	RUTH-Score	0.01	1	0.005	30	2	0.001	97	50000	0.00194
GT	RUTH-Score	0.01	1	0.005	30	2	0.0001	25	50000	0.0005
GT	RUTH-Score	0.01	1	0.005	30	2	1e-05	6	50000	0.00012
GT	RUTH-Score	0.01	1	0.005	30	2	1e-06	1	50000	2e-05
GT	RUTH-Score	0.01	1	0.005	30	2	1e-07	1	50000	2e-05
GT	RUTH-Score	0.01	1	0.005	30	2	1e-08	1	50000	2e-05
GL	RUTH-Score	0.01	1	0.005	30	2	0.05	2828	50000	0.05656
GL	RUTH-Score	0.01	1	0.005	30	2	0.01	621	50000	0.01242
GL	RUTH-Score	0.01	1	0.005	30	2	0.001	69	50000	0.00138
GL	RUTH-Score	0.01	1	0.005	30	2	0.0001	11	50000	0.00022
GL	RUTH-Score	0.01	1	0.005	30	2	1e-05	1	50000	2e-05
GL	RUTH-Score	0.01	1	0.005	30	2	1e-06	1	50000	2e-05
GL	RUTH-Score	0.01	1	0.005	30	2	1e-07	1	50000	2e-05
GL	RUTH-Score	0.01	1	0.005	30	2	1e-08	1	50000	2e-05
GT	RUTH-LRT	0.01	1	0.005	5	2	0.05	25648	50000	0.51296
GT	RUTH-LRT	0.01	1	0.005	5	2	0.01	17220	50000	0.3444
GT	RUTH-LRT	0.01	1	0.005	5	2	0.001	8773	50000	0.17546
GT	RUTH-LRT	0.01	1	0.005	5	2	0.0001	3943	50000	0.07886
GT	RUTH-LRT	0.01	1	0.005	5	2	1e-05	1600	50000	0.032
GT	RUTH-LRT	0.01	1	0.005	5	2	1e-06	599	50000	0.01198
GT	RUTH-LRT	0.01	1	0.005	5	2	1e-07	204	50000	0.00408
GT	RUTH-LRT	0.01	1	0.005	5	2	1e-08	77	50000	0.00154
GT	RUTH-LRT	0.01	1	0.01	30	2	0.05	3724	50000	0.07448
GT	RUTH-LRT	0.01	1	0.01	30	2	0.01	951	50000	0.01902
GT	RUTH-LRT	0.01	1	0.01	30	2	0.001	135	50000	0.0027
GT	RUTH-LRT	0.01	1	0.01	30	2	0.0001	18	50000	0.00036
GT	RUTH-LRT	0.01	1	0.01	30	2	1e-05	1	50000	2e-05
GT	RUTH-LRT	0.01	1	0.01	30	2	1e-06	0	50000	0
GT	RUTH-LRT	0.01	1	0.01	30	2	1e-07	0	50000	0
GT	RUTH-LRT	0.01	1	0.01	30	2	1e-08	0	50000	0
GL	RUTH-LRT	0.01	1	-0.005	5	2	0.05	2441	50000	0.04882
GL	RUTH-LRT	0.01	1	-0.005	5	2	0.01	511	50000	0.01022
GL	RUTH-LRT	0.01	1	-0.005	5	2	0.001	41	50000	0.00082
GL	RUTH-LRT	0.01	1	-0.005	5	2	0.0001	2	50000	4e-05
GL	RUTH-LRT	0.01	1	-0.005	5	2	1e-05	0	50000	0
GL	RUTH-LRT	0.01	1	-0.005	5	2	1e-06	0	50000	0
GL	RUTH-LRT	0.01	1	-0.005	5	2	1e-07	0	50000	0
GL	RUTH-LRT	0.01	1	-0.005	5	2	1e-08	0	50000	0
GL	RUTH-LRT	0.01	1	0.005	5	2	0.05	3779	50000	0.07558
GL	RUTH-LRT	0.01	1	0.005	5	2	0.01	961	50000	0.01922
GL	RUTH-LRT	0.01	1	0.005	5	2	0.001	130	50000	0.0026
GL	RUTH-LRT	0.01	1	0.005	5	2	0.0001	21	50000	0.00042
GL	RUTH-LRT	0.01	1	0.005	5	2	1e-05	1	50000	2e-05
GL	RUTH-LRT	0.01	1	0.005	5	2	1e-06	0	50000	0
GL	RUTH-LRT	0.01	1	0.005	5	2	1e-07	0	50000	0
GL	RUTH-LRT	0.01	1	0.005	5	2	1e-08	0	50000	0
GT	RUTH-Score	0.01	1	-0.005	5	2	0.05	23533	50000	0.47066
GT	RUTH-Score	0.01	1	-0.005	5	2	0.01	14026	50000	0.28052
GT	RUTH-Score	0.01	1	-0.005	5	2	0.001	5959	50000	0.11918
GT	RUTH-Score	0.01	1	-0.005	5	2	0.0001	2361	50000	0.04722
GT	RUTH-Score	0.01	1	-0.005	5	2	1e-05	881	50000	0.01762
GT	RUTH-Score	0.01	1	-0.005	5	2	1e-06	339	50000	0.00678
GT	RUTH-Score	0.01	1	-0.005	5	2	1e-07	140	50000	0.0028
GT	RUTH-Score	0.01	1	-0.005	5	2	1e-08	59	50000	0.00118
GT	RUTH-Score	0.01	1	0.005	5	2	0.05	25897	50000	0.51794
GT	RUTH-Score	0.01	1	0.005	5	2	0.01	17456	50000	0.34912
GT	RUTH-Score	0.01	1	0.005	5	2	0.001	8870	50000	0.1774
GT	RUTH-Score	0.01	1	0.005	5	2	0.0001	3942	50000	0.07884
GT	RUTH-Score	0.01	1	0.005	5	2	1e-05	1596	50000	0.03192
GT	RUTH-Score	0.01	1	0.005	5	2	1e-06	594	50000	0.01188
GT	RUTH-Score	0.01	1	0.005	5	2	1e-07	203	50000	0.00406
GT	RUTH-Score	0.01	1	0.005	5	2	1e-08	77	50000	0.00154
GL	RUTH-Score	0.01	1	-0.005	5	2	0.05	2366	50000	0.04732
GL	RUTH-Score	0.01	1	-0.005	5	2	0.01	522	50000	0.01044
GL	RUTH-Score	0.01	1	-0.005	5	2	0.001	52	50000	0.00104
GL	RUTH-Score	0.01	1	-0.005	5	2	0.0001	7	50000	0.00014
GL	RUTH-Score	0.01	1	-0.005	5	2	1e-05	2	50000	4e-05
GL	RUTH-Score	0.01	1	-0.005	5	2	1e-06	0	50000	0
GL	RUTH-Score	0.01	1	-0.005	5	2	1e-07	0	50000	0
GL	RUTH-Score	0.01	1	-0.005	5	2	1e-08	0	50000	0
GL	RUTH-Score	0.01	1	0.005	5	2	0.05	3332	50000	0.06664
GL	RUTH-Score	0.01	1	0.005	5	2	0.01	787	50000	0.01574
GL	RUTH-Score	0.01	1	0.005	5	2	0.001	99	50000	0.00198
GL	RUTH-Score	0.01	1	0.005	5	2	0.0001	14	50000	0.00028
GL	RUTH-Score	0.01	1	0.005	5	2	1e-05	2	50000	4e-05
GL	RUTH-Score	0.01	1	0.005	5	2	1e-06	0	50000	0
GL	RUTH-Score	0.01	1	0.005	5	2	1e-07	0	50000	0
GL	RUTH-Score	0.01	1	0.005	5	2	1e-08	0	50000	0
GT	RUTH-LRT	0.01	1	-0.01	5	2	0.05	21944	50000	0.43888
GT	RUTH-LRT	0.01	1	-0.01	5	2	0.01	12005	50000	0.2401
GT	RUTH-LRT	0.01	1	-0.01	5	2	0.001	4446	50000	0.08892
GT	RUTH-LRT	0.01	1	-0.01	5	2	0.0001	1507	50000	0.03014
GT	RUTH-LRT	0.01	1	-0.01	5	2	1e-05	534	50000	0.01068
GT	RUTH-LRT	0.01	1	-0.01	5	2	1e-06	151	50000	0.00302
GT	RUTH-LRT	0.01	1	-0.01	5	2	1e-07	43	50000	0.00086
GT	RUTH-LRT	0.01	1	-0.01	5	2	1e-08	14	50000	0.00028
GL	RUTH-LRT	0.01	1	-0.01	30	2	0.05	4988	50000	0.09976
GL	RUTH-LRT	0.01	1	-0.01	30	2	0.01	1325	50000	0.0265
GL	RUTH-LRT	0.01	1	-0.01	30	2	0.001	171	50000	0.00342
GL	RUTH-LRT	0.01	1	-0.01	30	2	0.0001	21	50000	0.00042
GL	RUTH-LRT	0.01	1	-0.01	30	2	1e-05	2	50000	4e-05
GL	RUTH-LRT	0.01	1	-0.01	30	2	1e-06	1	50000	2e-05
GL	RUTH-LRT	0.01	1	-0.01	30	2	1e-07	0	50000	0
GL	RUTH-LRT	0.01	1	-0.01	30	2	1e-08	0	50000	0
GL	RUTH-LRT	0.01	1	0.01	30	2	0.05	5364	50000	0.10728
GL	RUTH-LRT	0.01	1	0.01	30	2	0.01	1562	50000	0.03124
GL	RUTH-LRT	0.01	1	0.01	30	2	0.001	254	50000	0.00508
GL	RUTH-LRT	0.01	1	0.01	30	2	0.0001	39	50000	0.00078
GL	RUTH-LRT	0.01	1	0.01	30	2	1e-05	4	50000	8e-05
GL	RUTH-LRT	0.01	1	0.01	30	2	1e-06	1	50000	2e-05
GL	RUTH-LRT	0.01	1	0.01	30	2	1e-07	1	50000	2e-05
GL	RUTH-LRT	0.01	1	0.01	30	2	1e-08	0	50000	0
GT	RUTH-Score	0.01	1	-0.01	30	2	0.05	8427	50000	0.16854
GT	RUTH-Score	0.01	1	-0.01	30	2	0.01	3228	50000	0.06456
GT	RUTH-Score	0.01	1	-0.01	30	2	0.001	864	50000	0.01728
GT	RUTH-Score	0.01	1	-0.01	30	2	0.0001	222	50000	0.00444
GT	RUTH-Score	0.01	1	-0.01	30	2	1e-05	77	50000	0.00154
GT	RUTH-Score	0.01	1	-0.01	30	2	1e-06	24	50000	0.00048
GT	RUTH-Score	0.01	1	-0.01	30	2	1e-07	9	50000	0.00018
GT	RUTH-Score	0.01	1	-0.01	30	2	1e-08	6	50000	0.00012
GT	RUTH-Score	0.01	1	0.01	30	2	0.05	3550	50000	0.071
GT	RUTH-Score	0.01	1	0.01	30	2	0.01	914	50000	0.01828
GT	RUTH-Score	0.01	1	0.01	30	2	0.001	136	50000	0.00272
GT	RUTH-Score	0.01	1	0.01	30	2	0.0001	21	50000	0.00042
GT	RUTH-Score	0.01	1	0.01	30	2	1e-05	2	50000	4e-05
GT	RUTH-Score	0.01	1	0.01	30	2	1e-06	0	50000	0
GT	RUTH-Score	0.01	1	0.01	30	2	1e-07	0	50000	0
GT	RUTH-Score	0.01	1	0.01	30	2	1e-08	0	50000	0
GL	RUTH-Score	0.01	1	0.01	30	2	0.05	4604	50000	0.09208
GL	RUTH-Score	0.01	1	0.01	30	2	0.01	1217	50000	0.02434
GL	RUTH-Score	0.01	1	0.01	30	2	0.001	172	50000	0.00344
GL	RUTH-Score	0.01	1	0.01	30	2	0.0001	20	50000	0.0004
GL	RUTH-Score	0.01	1	0.01	30	2	1e-05	2	50000	4e-05
GL	RUTH-Score	0.01	1	0.01	30	2	1e-06	1	50000	2e-05
GL	RUTH-Score	0.01	1	0.01	30	2	1e-07	0	50000	0
GL	RUTH-Score	0.01	1	0.01	30	2	1e-08	0	50000	0
GT	RUTH-LRT	0.01	1	0.01	5	2	0.05	26698	50000	0.53396
GT	RUTH-LRT	0.01	1	0.01	5	2	0.01	19194	50000	0.38388
GT	RUTH-LRT	0.01	1	0.01	5	2	0.001	11004	50000	0.22008
GT	RUTH-LRT	0.01	1	0.01	5	2	0.0001	5477	50000	0.10954
GT	RUTH-LRT	0.01	1	0.01	5	2	1e-05	2462	50000	0.04924
GT	RUTH-LRT	0.01	1	0.01	5	2	1e-06	1008	50000	0.02016
GT	RUTH-LRT	0.01	1	0.01	5	2	1e-07	356	50000	0.00712
GT	RUTH-LRT	0.01	1	0.01	5	2	1e-08	129	50000	0.00258
GT	RUTH-LRT	0.01	1	-0.02	30	2	0.05	18247	50000	0.36494
GT	RUTH-LRT	0.01	1	-0.02	30	2	0.01	8414	50000	0.16828
GT	RUTH-LRT	0.01	1	-0.02	30	2	0.001	2372	50000	0.04744
GT	RUTH-LRT	0.01	1	-0.02	30	2	0.0001	634	50000	0.01268
GT	RUTH-LRT	0.01	1	-0.02	30	2	1e-05	154	50000	0.00308
GT	RUTH-LRT	0.01	1	-0.02	30	2	1e-06	30	50000	0.0006
GT	RUTH-LRT	0.01	1	-0.02	30	2	1e-07	6	50000	0.00012
GT	RUTH-LRT	0.01	1	-0.02	30	2	1e-08	0	50000	0
GL	RUTH-LRT	0.01	1	-0.01	5	2	0.05	2786	50000	0.05572
GL	RUTH-LRT	0.01	1	-0.01	5	2	0.01	566	50000	0.01132
GL	RUTH-LRT	0.01	1	-0.01	5	2	0.001	61	50000	0.00122
GL	RUTH-LRT	0.01	1	-0.01	5	2	0.0001	8	50000	0.00016
GL	RUTH-LRT	0.01	1	-0.01	5	2	1e-05	1	50000	2e-05
GL	RUTH-LRT	0.01	1	-0.01	5	2	1e-06	0	50000	0
GL	RUTH-LRT	0.01	1	-0.01	5	2	1e-07	0	50000	0
GL	RUTH-LRT	0.01	1	-0.01	5	2	1e-08	0	50000	0
GL	RUTH-LRT	0.01	1	0.01	5	2	0.05	5555	50000	0.1111
GL	RUTH-LRT	0.01	1	0.01	5	2	0.01	1697	50000	0.03394
GL	RUTH-LRT	0.01	1	0.01	5	2	0.001	278	50000	0.00556
GL	RUTH-LRT	0.01	1	0.01	5	2	0.0001	33	50000	0.00066
GL	RUTH-LRT	0.01	1	0.01	5	2	1e-05	2	50000	4e-05
GL	RUTH-LRT	0.01	1	0.01	5	2	1e-06	0	50000	0
GL	RUTH-LRT	0.01	1	0.01	5	2	1e-07	0	50000	0
GL	RUTH-LRT	0.01	1	0.01	5	2	1e-08	0	50000	0
GT	RUTH-Score	0.01	1	-0.01	5	2	0.05	22273	50000	0.44546
GT	RUTH-Score	0.01	1	-0.01	5	2	0.01	12739	50000	0.25478
GT	RUTH-Score	0.01	1	-0.01	5	2	0.001	5222	50000	0.10444
GT	RUTH-Score	0.01	1	-0.01	5	2	0.0001	2101	50000	0.04202
GT	RUTH-Score	0.01	1	-0.01	5	2	1e-05	851	50000	0.01702
GT	RUTH-Score	0.01	1	-0.01	5	2	1e-06	329	50000	0.00658
GT	RUTH-Score	0.01	1	-0.01	5	2	1e-07	154	50000	0.00308
GT	RUTH-Score	0.01	1	-0.01	5	2	1e-08	72	50000	0.00144
GT	RUTH-Score	0.01	1	0.01	5	2	0.05	26906	50000	0.53812
GT	RUTH-Score	0.01	1	0.01	5	2	0.01	19338	50000	0.38676
GT	RUTH-Score	0.01	1	0.01	5	2	0.001	10867	50000	0.21734
GT	RUTH-Score	0.01	1	0.01	5	2	0.0001	5283	50000	0.10566
GT	RUTH-Score	0.01	1	0.01	5	2	1e-05	2323	50000	0.04646
GT	RUTH-Score	0.01	1	0.01	5	2	1e-06	928	50000	0.01856
GT	RUTH-Score	0.01	1	0.01	5	2	1e-07	321	50000	0.00642
GT	RUTH-Score	0.01	1	0.01	5	2	1e-08	109	50000	0.00218
GL	RUTH-Score	0.01	1	-0.01	5	2	0.05	2843	50000	0.05686
GL	RUTH-Score	0.01	1	-0.01	5	2	0.01	653	50000	0.01306
GL	RUTH-Score	0.01	1	-0.01	5	2	0.001	86	50000	0.00172
GL	RUTH-Score	0.01	1	-0.01	5	2	0.0001	18	50000	0.00036
GL	RUTH-Score	0.01	1	-0.01	5	2	1e-05	4	50000	8e-05
GL	RUTH-Score	0.01	1	-0.01	5	2	1e-06	0	50000	0
GL	RUTH-Score	0.01	1	-0.01	5	2	1e-07	0	50000	0
GL	RUTH-Score	0.01	1	-0.01	5	2	1e-08	0	50000	0
GL	RUTH-Score	0.01	1	0.01	5	2	0.05	4922	50000	0.09844
GL	RUTH-Score	0.01	1	0.01	5	2	0.01	1398	50000	0.02796
GL	RUTH-Score	0.01	1	0.01	5	2	0.001	204	50000	0.00408
GL	RUTH-Score	0.01	1	0.01	5	2	0.0001	19	50000	0.00038
GL	RUTH-Score	0.01	1	0.01	5	2	1e-05	1	50000	2e-05
GL	RUTH-Score	0.01	1	0.01	5	2	1e-06	0	50000	0
GL	RUTH-Score	0.01	1	0.01	5	2	1e-07	0	50000	0
GL	RUTH-Score	0.01	1	0.01	5	2	1e-08	0	50000	0
GT	RUTH-LRT	0.01	1	0.02	30	2	0.05	9274	50000	0.18548
GT	RUTH-LRT	0.01	1	0.02	30	2	0.01	3489	50000	0.06978
GT	RUTH-LRT	0.01	1	0.02	30	2	0.001	761	50000	0.01522
GT	RUTH-LRT	0.01	1	0.02	30	2	0.0001	158	50000	0.00316
GT	RUTH-LRT	0.01	1	0.02	30	2	1e-05	31	50000	0.00062
GT	RUTH-LRT	0.01	1	0.02	30	2	1e-06	5	50000	0.0001
GT	RUTH-LRT	0.01	1	0.02	30	2	1e-07	2	50000	4e-05
GT	RUTH-LRT	0.01	1	0.02	30	2	1e-08	0	50000	0
GT	RUTH-LRT	0.01	1	-0.02	5	2	0.05	20019	50000	0.40038
GT	RUTH-LRT	0.01	1	-0.02	5	2	0.01	10896	50000	0.21792
GT	RUTH-LRT	0.01	1	-0.02	5	2	0.001	4156	50000	0.08312
GT	RUTH-LRT	0.01	1	-0.02	5	2	0.0001	1477	50000	0.02954
GT	RUTH-LRT	0.01	1	-0.02	5	2	1e-05	550	50000	0.011
GT	RUTH-LRT	0.01	1	-0.02	5	2	1e-06	211	50000	0.00422
GT	RUTH-LRT	0.01	1	-0.02	5	2	1e-07	88	50000	0.00176
GT	RUTH-LRT	0.01	1	-0.02	5	2	1e-08	45	50000	0.0009
GL	RUTH-LRT	0.01	1	-0.02	30	2	0.05	13521	50000	0.27042
GL	RUTH-LRT	0.01	1	-0.02	30	2	0.01	5288	50000	0.10576
GL	RUTH-LRT	0.01	1	-0.02	30	2	0.001	1287	50000	0.02574
GL	RUTH-LRT	0.01	1	-0.02	30	2	0.0001	296	50000	0.00592
GL	RUTH-LRT	0.01	1	-0.02	30	2	1e-05	48	50000	0.00096
GL	RUTH-LRT	0.01	1	-0.02	30	2	1e-06	6	50000	0.00012
GL	RUTH-LRT	0.01	1	-0.02	30	2	1e-07	0	50000	0
GL	RUTH-LRT	0.01	1	-0.02	30	2	1e-08	0	50000	0
GL	RUTH-LRT	0.01	1	0.02	30	2	0.05	13545	50000	0.2709
GL	RUTH-LRT	0.01	1	0.02	30	2	0.01	5657	50000	0.11314
GL	RUTH-LRT	0.01	1	0.02	30	2	0.001	1386	50000	0.02772
GL	RUTH-LRT	0.01	1	0.02	30	2	0.0001	308	50000	0.00616
GL	RUTH-LRT	0.01	1	0.02	30	2	1e-05	70	50000	0.0014
GL	RUTH-LRT	0.01	1	0.02	30	2	1e-06	13	50000	0.00026
GL	RUTH-LRT	0.01	1	0.02	30	2	1e-07	4	50000	8e-05
GL	RUTH-LRT	0.01	1	0.02	30	2	1e-08	0	50000	0
GT	RUTH-Score	0.01	1	-0.02	30	2	0.05	18886	50000	0.37772
GT	RUTH-Score	0.01	1	-0.02	30	2	0.01	9648	50000	0.19296
GT	RUTH-Score	0.01	1	-0.02	30	2	0.001	3457	50000	0.06914
GT	RUTH-Score	0.01	1	-0.02	30	2	0.0001	1293	50000	0.02586
GT	RUTH-Score	0.01	1	-0.02	30	2	1e-05	503	50000	0.01006
GT	RUTH-Score	0.01	1	-0.02	30	2	1e-06	209	50000	0.00418
GT	RUTH-Score	0.01	1	-0.02	30	2	1e-07	91	50000	0.00182
GT	RUTH-Score	0.01	1	-0.02	30	2	1e-08	52	50000	0.00104
GT	RUTH-Score	0.01	1	0.02	30	2	0.05	8574	50000	0.17148
GT	RUTH-Score	0.01	1	0.02	30	2	0.01	3095	50000	0.0619
GT	RUTH-Score	0.01	1	0.02	30	2	0.001	637	50000	0.01274
GT	RUTH-Score	0.01	1	0.02	30	2	0.0001	128	50000	0.00256
GT	RUTH-Score	0.01	1	0.02	30	2	1e-05	20	50000	0.0004
GT	RUTH-Score	0.01	1	0.02	30	2	1e-06	5	50000	0.0001
GT	RUTH-Score	0.01	1	0.02	30	2	1e-07	1	50000	2e-05
GT	RUTH-Score	0.01	1	0.02	30	2	1e-08	0	50000	0
GL	RUTH-Score	0.01	1	-0.02	30	2	0.05	14303	50000	0.28606
GL	RUTH-Score	0.01	1	-0.02	30	2	0.01	6239	50000	0.12478
GL	RUTH-Score	0.01	1	-0.02	30	2	0.001	1863	50000	0.03726
GL	RUTH-Score	0.01	1	-0.02	30	2	0.0001	602	50000	0.01204
GL	RUTH-Score	0.01	1	-0.02	30	2	1e-05	201	50000	0.00402
GL	RUTH-Score	0.01	1	-0.02	30	2	1e-06	80	50000	0.0016
GL	RUTH-Score	0.01	1	-0.02	30	2	1e-07	30	50000	0.0006
GL	RUTH-Score	0.01	1	-0.02	30	2	1e-08	14	50000	0.00028
GL	RUTH-Score	0.01	1	0.02	30	2	0.05	12044	50000	0.24088
GL	RUTH-Score	0.01	1	0.02	30	2	0.01	4595	50000	0.0919
GL	RUTH-Score	0.01	1	0.02	30	2	0.001	992	50000	0.01984
GL	RUTH-Score	0.01	1	0.02	30	2	0.0001	199	50000	0.00398
GL	RUTH-Score	0.01	1	0.02	30	2	1e-05	40	50000	0.0008
GL	RUTH-Score	0.01	1	0.02	30	2	1e-06	6	50000	0.00012
GL	RUTH-Score	0.01	1	0.02	30	2	1e-07	1	50000	2e-05
GL	RUTH-Score	0.01	1	0.02	30	2	1e-08	0	50000	0
GT	RUTH-LRT	0.01	1	0.02	5	2	0.05	28441	50000	0.56882
GT	RUTH-LRT	0.01	1	0.02	5	2	0.01	23071	50000	0.46142
GT	RUTH-LRT	0.01	1	0.02	5	2	0.001	15924	50000	0.31848
GT	RUTH-LRT	0.01	1	0.02	5	2	0.0001	9668	50000	0.19336
GT	RUTH-LRT	0.01	1	0.02	5	2	1e-05	5336	50000	0.10672
GT	RUTH-LRT	0.01	1	0.02	5	2	1e-06	2603	50000	0.05206
GT	RUTH-LRT	0.01	1	0.02	5	2	1e-07	1178	50000	0.02356
GT	RUTH-LRT	0.01	1	0.02	5	2	1e-08	476	50000	0.00952
GT	RUTH-LRT	0.01	1	-0.05	30	2	0.05	45833	50000	0.91666
GT	RUTH-LRT	0.01	1	-0.05	30	2	0.01	41039	50000	0.82078
GT	RUTH-LRT	0.01	1	-0.05	30	2	0.001	31118	50000	0.62236
GT	RUTH-LRT	0.01	1	-0.05	30	2	0.0001	20390	50000	0.4078
GT	RUTH-LRT	0.01	1	-0.05	30	2	1e-05	11522	50000	0.23044
GT	RUTH-LRT	0.01	1	-0.05	30	2	1e-06	5577	50000	0.11154
GT	RUTH-LRT	0.01	1	-0.05	30	2	1e-07	2379	50000	0.04758
GT	RUTH-LRT	0.01	1	-0.05	30	2	1e-08	933	50000	0.01866
GL	RUTH-LRT	0.01	1	-0.02	5	2	0.05	6283	50000	0.12566
GL	RUTH-LRT	0.01	1	-0.02	5	2	0.01	1954	50000	0.03908
GL	RUTH-LRT	0.01	1	-0.02	5	2	0.001	325	50000	0.0065
GL	RUTH-LRT	0.01	1	-0.02	5	2	0.0001	48	50000	0.00096
GL	RUTH-LRT	0.01	1	-0.02	5	2	1e-05	5	50000	0.0001
GL	RUTH-LRT	0.01	1	-0.02	5	2	1e-06	1	50000	2e-05
GL	RUTH-LRT	0.01	1	-0.02	5	2	1e-07	0	50000	0
GL	RUTH-LRT	0.01	1	-0.02	5	2	1e-08	0	50000	0
GL	RUTH-LRT	0.01	1	0.02	5	2	0.05	11925	50000	0.2385
GL	RUTH-LRT	0.01	1	0.02	5	2	0.01	4606	50000	0.09212
GL	RUTH-LRT	0.01	1	0.02	5	2	0.001	1054	50000	0.02108
GL	RUTH-LRT	0.01	1	0.02	5	2	0.0001	207	50000	0.00414
GL	RUTH-LRT	0.01	1	0.02	5	2	1e-05	38	50000	0.00076
GL	RUTH-LRT	0.01	1	0.02	5	2	1e-06	8	50000	0.00016
GL	RUTH-LRT	0.01	1	0.02	5	2	1e-07	1	50000	2e-05
GL	RUTH-LRT	0.01	1	0.02	5	2	1e-08	0	50000	0
GT	RUTH-Score	0.01	1	-0.02	5	2	0.05	20411	50000	0.40822
GT	RUTH-Score	0.01	1	-0.02	5	2	0.01	11974	50000	0.23948
GT	RUTH-Score	0.01	1	-0.02	5	2	0.001	5537	50000	0.11074
GT	RUTH-Score	0.01	1	-0.02	5	2	0.0001	2687	50000	0.05374
GT	RUTH-Score	0.01	1	-0.02	5	2	1e-05	1324	50000	0.02648
GT	RUTH-Score	0.01	1	-0.02	5	2	1e-06	687	50000	0.01374
GT	RUTH-Score	0.01	1	-0.02	5	2	1e-07	370	50000	0.0074
GT	RUTH-Score	0.01	1	-0.02	5	2	1e-08	200	50000	0.004
GT	RUTH-Score	0.01	1	0.02	5	2	0.05	28531	50000	0.57062
GT	RUTH-Score	0.01	1	0.02	5	2	0.01	23065	50000	0.4613
GT	RUTH-Score	0.01	1	0.02	5	2	0.001	15566	50000	0.31132
GT	RUTH-Score	0.01	1	0.02	5	2	0.0001	9212	50000	0.18424
GT	RUTH-Score	0.01	1	0.02	5	2	1e-05	4943	50000	0.09886
GT	RUTH-Score	0.01	1	0.02	5	2	1e-06	2351	50000	0.04702
GT	RUTH-Score	0.01	1	0.02	5	2	1e-07	1017	50000	0.02034
GT	RUTH-Score	0.01	1	0.02	5	2	1e-08	393	50000	0.00786
GL	RUTH-Score	0.01	1	-0.02	5	2	0.05	6513	50000	0.13026
GL	RUTH-Score	0.01	1	-0.02	5	2	0.01	2206	50000	0.04412
GL	RUTH-Score	0.01	1	-0.02	5	2	0.001	428	50000	0.00856
GL	RUTH-Score	0.01	1	-0.02	5	2	0.0001	88	50000	0.00176
GL	RUTH-Score	0.01	1	-0.02	5	2	1e-05	16	50000	0.00032
GL	RUTH-Score	0.01	1	-0.02	5	2	1e-06	3	50000	6e-05
GL	RUTH-Score	0.01	1	-0.02	5	2	1e-07	1	50000	2e-05
GL	RUTH-Score	0.01	1	-0.02	5	2	1e-08	0	50000	0
GL	RUTH-Score	0.01	1	0.02	5	2	0.05	10788	50000	0.21576
GL	RUTH-Score	0.01	1	0.02	5	2	0.01	3933	50000	0.07866
GL	RUTH-Score	0.01	1	0.02	5	2	0.001	862	50000	0.01724
GL	RUTH-Score	0.01	1	0.02	5	2	0.0001	155	50000	0.0031
GL	RUTH-Score	0.01	1	0.02	5	2	1e-05	29	50000	0.00058
GL	RUTH-Score	0.01	1	0.02	5	2	1e-06	5	50000	0.0001
GL	RUTH-Score	0.01	1	0.02	5	2	1e-07	0	50000	0
GL	RUTH-Score	0.01	1	0.02	5	2	1e-08	0	50000	0
GT	RUTH-LRT	0.01	1	0.05	30	2	0.05	39983	50000	0.79966
GT	RUTH-LRT	0.01	1	0.05	30	2	0.01	31312	50000	0.62624
GT	RUTH-LRT	0.01	1	0.05	30	2	0.001	18941	50000	0.37882
GT	RUTH-LRT	0.01	1	0.05	30	2	0.0001	9872	50000	0.19744
GT	RUTH-LRT	0.01	1	0.05	30	2	1e-05	4445	50000	0.0889
GT	RUTH-LRT	0.01	1	0.05	30	2	1e-06	1790	50000	0.0358
GT	RUTH-LRT	0.01	1	0.05	30	2	1e-07	709	50000	0.01418
GT	RUTH-LRT	0.01	1	0.05	30	2	1e-08	226	50000	0.00452
GT	RUTH-LRT	0.01	1	-0.05	5	2	0.05	19329	50000	0.38658
GT	RUTH-LRT	0.01	1	-0.05	5	2	0.01	15118	50000	0.30236
GT	RUTH-LRT	0.01	1	-0.05	5	2	0.001	10512	50000	0.21024
GT	RUTH-LRT	0.01	1	-0.05	5	2	0.0001	6349	50000	0.12698
GT	RUTH-LRT	0.01	1	-0.05	5	2	1e-05	3480	50000	0.0696
GT	RUTH-LRT	0.01	1	-0.05	5	2	1e-06	1774	50000	0.03548
GT	RUTH-LRT	0.01	1	-0.05	5	2	1e-07	926	50000	0.01852
GT	RUTH-LRT	0.01	1	-0.05	5	2	1e-08	488	50000	0.00976
GL	RUTH-LRT	0.01	1	-0.05	30	2	0.05	45120	50000	0.9024
GL	RUTH-LRT	0.01	1	-0.05	30	2	0.01	39358	50000	0.78716
GL	RUTH-LRT	0.01	1	-0.05	30	2	0.001	27780	50000	0.5556
GL	RUTH-LRT	0.01	1	-0.05	30	2	0.0001	16563	50000	0.33126
GL	RUTH-LRT	0.01	1	-0.05	30	2	1e-05	8214	50000	0.16428
GL	RUTH-LRT	0.01	1	-0.05	30	2	1e-06	3537	50000	0.07074
GL	RUTH-LRT	0.01	1	-0.05	30	2	1e-07	1337	50000	0.02674
GL	RUTH-LRT	0.01	1	-0.05	30	2	1e-08	463	50000	0.00926
GL	RUTH-LRT	0.01	1	0.05	30	2	0.05	44441	50000	0.88882
GL	RUTH-LRT	0.01	1	0.05	30	2	0.01	37569	50000	0.75138
GL	RUTH-LRT	0.01	1	0.05	30	2	0.001	25177	50000	0.50354
GL	RUTH-LRT	0.01	1	0.05	30	2	0.0001	14388	50000	0.28776
GL	RUTH-LRT	0.01	1	0.05	30	2	1e-05	7079	50000	0.14158
GL	RUTH-LRT	0.01	1	0.05	30	2	1e-06	3144	50000	0.06288
GL	RUTH-LRT	0.01	1	0.05	30	2	1e-07	1288	50000	0.02576
GL	RUTH-LRT	0.01	1	0.05	30	2	1e-08	458	50000	0.00916
GT	RUTH-Score	0.01	1	-0.05	30	2	0.05	45823	50000	0.91646
GT	RUTH-Score	0.01	1	-0.05	30	2	0.01	41555	50000	0.8311
GT	RUTH-Score	0.01	1	-0.05	30	2	0.001	32788	50000	0.65576
GT	RUTH-Score	0.01	1	-0.05	30	2	0.0001	23435	50000	0.4687
GT	RUTH-Score	0.01	1	-0.05	30	2	1e-05	15814	50000	0.31628
GT	RUTH-Score	0.01	1	-0.05	30	2	1e-06	10428	50000	0.20856
GT	RUTH-Score	0.01	1	-0.05	30	2	1e-07	6930	50000	0.1386
GT	RUTH-Score	0.01	1	-0.05	30	2	1e-08	4684	50000	0.09368
GT	RUTH-Score	0.01	1	0.05	30	2	0.05	38118	50000	0.76236
GT	RUTH-Score	0.01	1	0.05	30	2	0.01	28901	50000	0.57802
GT	RUTH-Score	0.01	1	0.05	30	2	0.001	16675	50000	0.3335
GT	RUTH-Score	0.01	1	0.05	30	2	0.0001	8330	50000	0.1666
GT	RUTH-Score	0.01	1	0.05	30	2	1e-05	3603	50000	0.07206
GT	RUTH-Score	0.01	1	0.05	30	2	1e-06	1426	50000	0.02852
GT	RUTH-Score	0.01	1	0.05	30	2	1e-07	508	50000	0.01016
GT	RUTH-Score	0.01	1	0.05	30	2	1e-08	160	50000	0.0032
GL	RUTH-Score	0.01	1	-0.05	30	2	0.05	45201	50000	0.90402
GL	RUTH-Score	0.01	1	-0.05	30	2	0.01	40104	50000	0.80208
GL	RUTH-Score	0.01	1	-0.05	30	2	0.001	30026	50000	0.60052
GL	RUTH-Score	0.01	1	-0.05	30	2	0.0001	20093	50000	0.40186
GL	RUTH-Score	0.01	1	-0.05	30	2	1e-05	12475	50000	0.2495
GL	RUTH-Score	0.01	1	-0.05	30	2	1e-06	7634	50000	0.15268
GL	RUTH-Score	0.01	1	-0.05	30	2	1e-07	4750	50000	0.095
GL	RUTH-Score	0.01	1	-0.05	30	2	1e-08	3067	50000	0.06134
GL	RUTH-Score	0.01	1	0.05	30	2	0.05	42498	50000	0.84996
GL	RUTH-Score	0.01	1	0.05	30	2	0.01	34508	50000	0.69016
GL	RUTH-Score	0.01	1	0.05	30	2	0.001	21531	50000	0.43062
GL	RUTH-Score	0.01	1	0.05	30	2	0.0001	11286	50000	0.22572
GL	RUTH-Score	0.01	1	0.05	30	2	1e-05	5175	50000	0.1035
GL	RUTH-Score	0.01	1	0.05	30	2	1e-06	2096	50000	0.04192
GL	RUTH-Score	0.01	1	0.05	30	2	1e-07	794	50000	0.01588
GL	RUTH-Score	0.01	1	0.05	30	2	1e-08	246	50000	0.00492
GT	RUTH-LRT	0.01	1	0.05	5	2	0.05	31859	50000	0.63718
GT	RUTH-LRT	0.01	1	0.05	5	2	0.01	29526	50000	0.59052
GT	RUTH-LRT	0.01	1	0.05	5	2	0.001	27032	50000	0.54064
GT	RUTH-LRT	0.01	1	0.05	5	2	0.0001	23747	50000	0.47494
GT	RUTH-LRT	0.01	1	0.05	5	2	1e-05	19475	50000	0.3895
GT	RUTH-LRT	0.01	1	0.05	5	2	1e-06	14813	50000	0.29626
GT	RUTH-LRT	0.01	1	0.05	5	2	1e-07	10324	50000	0.20648
GT	RUTH-LRT	0.01	1	0.05	5	2	1e-08	6666	50000	0.13332
GT	RUTH-LRT	0.01	1	0	30	2	0.05	3244	50000	0.06488
GT	RUTH-LRT	0.01	1	0	30	2	0.01	774	50000	0.01548
GT	RUTH-LRT	0.01	1	0	30	2	0.001	80	50000	0.0016
GT	RUTH-LRT	0.01	1	0	30	2	0.0001	6	50000	0.00012
GT	RUTH-LRT	0.01	1	0	30	2	1e-05	1	50000	2e-05
GT	RUTH-LRT	0.01	1	0	30	2	1e-06	0	50000	0
GT	RUTH-LRT	0.01	1	0	30	2	1e-07	0	50000	0
GT	RUTH-LRT	0.01	1	0	30	2	1e-08	0	50000	0
GL	RUTH-LRT	0.01	1	-0.05	5	2	0.05	32656	50000	0.65312
GL	RUTH-LRT	0.01	1	-0.05	5	2	0.01	20954	50000	0.41908
GL	RUTH-LRT	0.01	1	-0.05	5	2	0.001	9153	50000	0.18306
GL	RUTH-LRT	0.01	1	-0.05	5	2	0.0001	3410	50000	0.0682
GL	RUTH-LRT	0.01	1	-0.05	5	2	1e-05	1092	50000	0.02184
GL	RUTH-LRT	0.01	1	-0.05	5	2	1e-06	327	50000	0.00654
GL	RUTH-LRT	0.01	1	-0.05	5	2	1e-07	73	50000	0.00146
GL	RUTH-LRT	0.01	1	-0.05	5	2	1e-08	16	50000	0.00032
GL	RUTH-LRT	0.01	1	0.05	5	2	0.05	38082	50000	0.76164
GL	RUTH-LRT	0.01	1	0.05	5	2	0.01	28277	50000	0.56554
GL	RUTH-LRT	0.01	1	0.05	5	2	0.001	15619	50000	0.31238
GL	RUTH-LRT	0.01	1	0.05	5	2	0.0001	7298	50000	0.14596
GL	RUTH-LRT	0.01	1	0.05	5	2	1e-05	3060	50000	0.0612
GL	RUTH-LRT	0.01	1	0.05	5	2	1e-06	1156	50000	0.02312
GL	RUTH-LRT	0.01	1	0.05	5	2	1e-07	401	50000	0.00802
GL	RUTH-LRT	0.01	1	0.05	5	2	1e-08	117	50000	0.00234
GT	RUTH-Score	0.01	1	-0.05	5	2	0.05	19450	50000	0.389
GT	RUTH-Score	0.01	1	-0.05	5	2	0.01	15983	50000	0.31966
GT	RUTH-Score	0.01	1	-0.05	5	2	0.001	12509	50000	0.25018
GT	RUTH-Score	0.01	1	-0.05	5	2	0.0001	9324	50000	0.18648
GT	RUTH-Score	0.01	1	-0.05	5	2	1e-05	6752	50000	0.13504
GT	RUTH-Score	0.01	1	-0.05	5	2	1e-06	4771	50000	0.09542
GT	RUTH-Score	0.01	1	-0.05	5	2	1e-07	3240	50000	0.0648
GT	RUTH-Score	0.01	1	-0.05	5	2	1e-08	2177	50000	0.04354
GT	RUTH-Score	0.01	1	0.05	5	2	0.05	31373	50000	0.62746
GT	RUTH-Score	0.01	1	0.05	5	2	0.01	29155	50000	0.5831
GT	RUTH-Score	0.01	1	0.05	5	2	0.001	26617	50000	0.53234
GT	RUTH-Score	0.01	1	0.05	5	2	0.0001	23109	50000	0.46218
GT	RUTH-Score	0.01	1	0.05	5	2	1e-05	18600	50000	0.372
GT	RUTH-Score	0.01	1	0.05	5	2	1e-06	13755	50000	0.2751
GT	RUTH-Score	0.01	1	0.05	5	2	1e-07	9365	50000	0.1873
GT	RUTH-Score	0.01	1	0.05	5	2	1e-08	5888	50000	0.11776
GL	RUTH-Score	0.01	1	-0.05	5	2	0.05	33087	50000	0.66174
GL	RUTH-Score	0.01	1	-0.05	5	2	0.01	22119	50000	0.44238
GL	RUTH-Score	0.01	1	-0.05	5	2	0.001	10514	50000	0.21028
GL	RUTH-Score	0.01	1	-0.05	5	2	0.0001	4376	50000	0.08752
GL	RUTH-Score	0.01	1	-0.05	5	2	1e-05	1642	50000	0.03284
GL	RUTH-Score	0.01	1	-0.05	5	2	1e-06	593	50000	0.01186
GL	RUTH-Score	0.01	1	-0.05	5	2	1e-07	185	50000	0.0037
GL	RUTH-Score	0.01	1	-0.05	5	2	1e-08	62	50000	0.00124
GL	RUTH-Score	0.01	1	0.05	5	2	0.05	35873	50000	0.71746
GL	RUTH-Score	0.01	1	0.05	5	2	0.01	25807	50000	0.51614
GL	RUTH-Score	0.01	1	0.05	5	2	0.001	13578	50000	0.27156
GL	RUTH-Score	0.01	1	0.05	5	2	0.0001	6078	50000	0.12156
GL	RUTH-Score	0.01	1	0.05	5	2	1e-05	2395	50000	0.0479
GL	RUTH-Score	0.01	1	0.05	5	2	1e-06	853	50000	0.01706
GL	RUTH-Score	0.01	1	0.05	5	2	1e-07	292	50000	0.00584
GL	RUTH-Score	0.01	1	0.05	5	2	1e-08	81	50000	0.00162
GT	RUTH-LRT	0.01	1	0	5	2	0.05	24473	50000	0.48946
GT	RUTH-LRT	0.01	1	0	5	2	0.01	15104	50000	0.30208
GT	RUTH-LRT	0.01	1	0	5	2	0.001	6836	50000	0.13672
GT	RUTH-LRT	0.01	1	0	5	2	0.0001	2765	50000	0.0553
GT	RUTH-LRT	0.01	1	0	5	2	1e-05	1029	50000	0.02058
GT	RUTH-LRT	0.01	1	0	5	2	1e-06	330	50000	0.0066
GT	RUTH-LRT	0.01	1	0	5	2	1e-07	93	50000	0.00186
GT	RUTH-LRT	0.01	1	0	5	2	1e-08	33	50000	0.00066
GL	RUTH-LRT	0.01	1	0	30	2	0.05	2455	50000	0.0491
GL	RUTH-LRT	0.01	1	0	30	2	0.01	476	50000	0.00952
GL	RUTH-LRT	0.01	1	0	30	2	0.001	41	50000	0.00082
GL	RUTH-LRT	0.01	1	0	30	2	0.0001	2	50000	4e-05
GL	RUTH-LRT	0.01	1	0	30	2	1e-05	0	50000	0
GL	RUTH-LRT	0.01	1	0	30	2	1e-06	0	50000	0
GL	RUTH-LRT	0.01	1	0	30	2	1e-07	0	50000	0
GL	RUTH-LRT	0.01	1	0	30	2	1e-08	0	50000	0
GT	RUTH-Score	0.01	1	0	30	2	0.05	3494	50000	0.06988
GT	RUTH-Score	0.01	1	0	30	2	0.01	961	50000	0.01922
GT	RUTH-Score	0.01	1	0	30	2	0.001	156	50000	0.00312
GT	RUTH-Score	0.01	1	0	30	2	0.0001	45	50000	0.0009
GT	RUTH-Score	0.01	1	0	30	2	1e-05	6	50000	0.00012
GT	RUTH-Score	0.01	1	0	30	2	1e-06	2	50000	4e-05
GT	RUTH-Score	0.01	1	0	30	2	1e-07	0	50000	0
GT	RUTH-Score	0.01	1	0	30	2	1e-08	0	50000	0
GT	RUTH-LRT	0.1	1	0	5	2	0.05	24646	50000	0.49292
GT	RUTH-LRT	0.1	1	0	5	2	0.01	15414	50000	0.30828
GT	RUTH-LRT	0.1	1	0	5	2	0.001	7177	50000	0.14354
GT	RUTH-LRT	0.1	1	0	5	2	0.0001	2955	50000	0.0591
GT	RUTH-LRT	0.1	1	0	5	2	1e-05	1107	50000	0.02214
GT	RUTH-LRT	0.1	1	0	5	2	1e-06	343	50000	0.00686
GT	RUTH-LRT	0.1	1	0	5	2	1e-07	125	50000	0.0025
GT	RUTH-LRT	0.1	1	0	5	2	1e-08	39	50000	0.00078
GL	RUTH-LRT	0.01	1	0	5	2	0.05	2602	50000	0.05204
GL	RUTH-LRT	0.01	1	0	5	2	0.01	547	50000	0.01094
GL	RUTH-LRT	0.01	1	0	5	2	0.001	69	50000	0.00138
GL	RUTH-LRT	0.01	1	0	5	2	0.0001	7	50000	0.00014
GL	RUTH-LRT	0.01	1	0	5	2	1e-05	0	50000	0
GL	RUTH-LRT	0.01	1	0	5	2	1e-06	0	50000	0
GL	RUTH-LRT	0.01	1	0	5	2	1e-07	0	50000	0
GL	RUTH-LRT	0.01	1	0	5	2	1e-08	0	50000	0
GT	RUTH-Score	0.01	1	0	5	2	0.05	24742	50000	0.49484
GT	RUTH-Score	0.01	1	0	5	2	0.01	15556	50000	0.31112
GT	RUTH-Score	0.01	1	0	5	2	0.001	7123	50000	0.14246
GT	RUTH-Score	0.01	1	0	5	2	0.0001	2923	50000	0.05846
GT	RUTH-Score	0.01	1	0	5	2	1e-05	1112	50000	0.02224
GT	RUTH-Score	0.01	1	0	5	2	1e-06	376	50000	0.00752
GT	RUTH-Score	0.01	1	0	5	2	1e-07	117	50000	0.00234
GT	RUTH-Score	0.01	1	0	5	2	1e-08	41	50000	0.00082
GL	RUTH-Score	0.01	1	0	5	2	0.05	2377	50000	0.04754
GL	RUTH-Score	0.01	1	0	5	2	0.01	498	50000	0.00996
GL	RUTH-Score	0.01	1	0	5	2	0.001	63	50000	0.00126
GL	RUTH-Score	0.01	1	0	5	2	0.0001	6	50000	0.00012
GL	RUTH-Score	0.01	1	0	5	2	1e-05	0	50000	0
GL	RUTH-Score	0.01	1	0	5	2	1e-06	0	50000	0
GL	RUTH-Score	0.01	1	0	5	2	1e-07	0	50000	0
GL	RUTH-Score	0.01	1	0	5	2	1e-08	0	50000	0
GT	RUTH-LRT	0.01	1	0.1	30	2	0.05	49006	50000	0.98012
GT	RUTH-LRT	0.01	1	0.1	30	2	0.01	48579	50000	0.97158
GT	RUTH-LRT	0.01	1	0.1	30	2	0.001	47658	50000	0.95316
GT	RUTH-LRT	0.01	1	0.1	30	2	0.0001	46045	50000	0.9209
GT	RUTH-LRT	0.01	1	0.1	30	2	1e-05	43826	50000	0.87652
GT	RUTH-LRT	0.01	1	0.1	30	2	1e-06	40612	50000	0.81224
GT	RUTH-LRT	0.01	1	0.1	30	2	1e-07	36441	50000	0.72882
GT	RUTH-LRT	0.01	1	0.1	30	2	1e-08	31301	50000	0.62602
GT	RUTH-LRT	0.01	1	-0.1	5	2	0.05	39533	50000	0.79066
GT	RUTH-LRT	0.01	1	-0.1	5	2	0.01	32568	50000	0.65136
GT	RUTH-LRT	0.01	1	-0.1	5	2	0.001	24619	50000	0.49238
GT	RUTH-LRT	0.01	1	-0.1	5	2	0.0001	19035	50000	0.3807
GT	RUTH-LRT	0.01	1	-0.1	5	2	1e-05	15394	50000	0.30788
GT	RUTH-LRT	0.01	1	-0.1	5	2	1e-06	12827	50000	0.25654
GT	RUTH-LRT	0.01	1	-0.1	5	2	1e-07	10609	50000	0.21218
GT	RUTH-LRT	0.01	1	-0.1	5	2	1e-08	8441	50000	0.16882
GL	RUTH-LRT	0.01	1	0.1	30	2	0.05	49461	50000	0.98922
GL	RUTH-LRT	0.01	1	0.1	30	2	0.01	49241	50000	0.98482
GL	RUTH-LRT	0.01	1	0.1	30	2	0.001	48804	50000	0.97608
GL	RUTH-LRT	0.01	1	0.1	30	2	0.0001	48074	50000	0.96148
GL	RUTH-LRT	0.01	1	0.1	30	2	1e-05	46739	50000	0.93478
GL	RUTH-LRT	0.01	1	0.1	30	2	1e-06	44717	50000	0.89434
GL	RUTH-LRT	0.01	1	0.1	30	2	1e-07	41615	50000	0.8323
GL	RUTH-LRT	0.01	1	0.1	30	2	1e-08	37312	50000	0.74624
GT	RUTH-Score	0.01	1	-0.1	30	2	0.05	47826	50000	0.95652
GT	RUTH-Score	0.01	1	-0.1	30	2	0.01	47517	50000	0.95034
GT	RUTH-Score	0.01	1	-0.1	30	2	0.001	47165	50000	0.9433
GT	RUTH-Score	0.01	1	-0.1	30	2	0.0001	46834	50000	0.93668
GT	RUTH-Score	0.01	1	-0.1	30	2	1e-05	46446	50000	0.92892
GT	RUTH-Score	0.01	1	-0.1	30	2	1e-06	45843	50000	0.91686
GT	RUTH-Score	0.01	1	-0.1	30	2	1e-07	44736	50000	0.89472
GT	RUTH-Score	0.01	1	-0.1	30	2	1e-08	42931	50000	0.85862
GT	RUTH-Score	0.01	1	0.1	30	2	0.05	47991	50000	0.95982
GT	RUTH-Score	0.01	1	0.1	30	2	0.01	47012	50000	0.94024
GT	RUTH-Score	0.01	1	0.1	30	2	0.001	45040	50000	0.9008
GT	RUTH-Score	0.01	1	0.1	30	2	0.0001	42588	50000	0.85176
GT	RUTH-Score	0.01	1	0.1	30	2	1e-05	39427	50000	0.78854
GT	RUTH-Score	0.01	1	0.1	30	2	1e-06	35547	50000	0.71094
GT	RUTH-Score	0.01	1	0.1	30	2	1e-07	31032	50000	0.62064
GT	RUTH-Score	0.01	1	0.1	30	2	1e-08	25901	50000	0.51802
GL	RUTH-Score	0.01	1	-0.1	30	2	0.05	47860	50000	0.9572
GL	RUTH-Score	0.01	1	-0.1	30	2	0.01	47535	50000	0.9507
GL	RUTH-Score	0.01	1	-0.1	30	2	0.001	47185	50000	0.9437
GL	RUTH-Score	0.01	1	-0.1	30	2	0.0001	46850	50000	0.937
GL	RUTH-Score	0.01	1	-0.1	30	2	1e-05	46450	50000	0.929
GL	RUTH-Score	0.01	1	-0.1	30	2	1e-06	45814	50000	0.91628
GL	RUTH-Score	0.01	1	-0.1	30	2	1e-07	44603	50000	0.89206
GL	RUTH-Score	0.01	1	-0.1	30	2	1e-08	42737	50000	0.85474
GL	RUTH-Score	0.01	1	0.1	30	2	0.05	48636	50000	0.97272
GL	RUTH-Score	0.01	1	0.1	30	2	0.01	47841	50000	0.95682
GL	RUTH-Score	0.01	1	0.1	30	2	0.001	46398	50000	0.92796
GL	RUTH-Score	0.01	1	0.1	30	2	0.0001	44573	50000	0.89146
GL	RUTH-Score	0.01	1	0.1	30	2	1e-05	42266	50000	0.84532
GL	RUTH-Score	0.01	1	0.1	30	2	1e-06	39196	50000	0.78392
GL	RUTH-Score	0.01	1	0.1	30	2	1e-07	35168	50000	0.70336
GL	RUTH-Score	0.01	1	0.1	30	2	1e-08	30257	50000	0.60514
GT	RUTH-LRT	0.01	1	0.1	5	2	0.05	41306	50000	0.82612
GT	RUTH-LRT	0.01	1	0.1	5	2	0.01	38150	50000	0.763
GT	RUTH-LRT	0.01	1	0.1	5	2	0.001	34673	50000	0.69346
GT	RUTH-LRT	0.01	1	0.1	5	2	0.0001	32164	50000	0.64328
GT	RUTH-LRT	0.01	1	0.1	5	2	1e-05	30448	50000	0.60896
GT	RUTH-LRT	0.01	1	0.1	5	2	1e-06	29247	50000	0.58494
GT	RUTH-LRT	0.01	1	0.1	5	2	1e-07	28168	50000	0.56336
GT	RUTH-LRT	0.01	1	0.1	5	2	1e-08	26893	50000	0.53786
GT	RUTH-LRT	0.1	1	0.1	5	2	0.05	41314	50000	0.82628
GT	RUTH-LRT	0.1	1	0.1	5	2	0.01	38277	50000	0.76554
GT	RUTH-LRT	0.1	1	0.1	5	2	0.001	34755	50000	0.6951
GT	RUTH-LRT	0.1	1	0.1	5	2	0.0001	32188	50000	0.64376
GT	RUTH-LRT	0.1	1	0.1	5	2	1e-05	30487	50000	0.60974
GT	RUTH-LRT	0.1	1	0.1	5	2	1e-06	29319	50000	0.58638
GT	RUTH-LRT	0.1	1	0.1	5	2	1e-07	28264	50000	0.56528
GT	RUTH-LRT	0.1	1	0.1	5	2	1e-08	27027	50000	0.54054
GT	RUTH-Score	0.01	1	-0.1	5	2	0.05	39550	50000	0.791
GT	RUTH-Score	0.01	1	-0.1	5	2	0.01	33079	50000	0.66158
GT	RUTH-Score	0.01	1	-0.1	5	2	0.001	25671	50000	0.51342
GT	RUTH-Score	0.01	1	-0.1	5	2	0.0001	20802	50000	0.41604
GT	RUTH-Score	0.01	1	-0.1	5	2	1e-05	17874	50000	0.35748
GT	RUTH-Score	0.01	1	-0.1	5	2	1e-06	15945	50000	0.3189
GT	RUTH-Score	0.01	1	-0.1	5	2	1e-07	14384	50000	0.28768
GT	RUTH-Score	0.01	1	-0.1	5	2	1e-08	12842	50000	0.25684
GT	RUTH-Score	0.01	1	0.1	5	2	0.05	40013	50000	0.80026
GT	RUTH-Score	0.01	1	0.1	5	2	0.01	36772	50000	0.73544
GT	RUTH-Score	0.01	1	0.1	5	2	0.001	33312	50000	0.66624
GT	RUTH-Score	0.01	1	0.1	5	2	0.0001	30885	50000	0.6177
GT	RUTH-Score	0.01	1	0.1	5	2	1e-05	29397	50000	0.58794
GT	RUTH-Score	0.01	1	0.1	5	2	1e-06	28409	50000	0.56818
GT	RUTH-Score	0.01	1	0.1	5	2	1e-07	27358	50000	0.54716
GT	RUTH-Score	0.01	1	0.1	5	2	1e-08	25878	50000	0.51756
GT	RUTH-LRT	0.01	1	0.2	30	2	0.05	49457	50000	0.98914
GT	RUTH-LRT	0.01	1	0.2	30	2	0.01	49370	50000	0.9874
GT	RUTH-LRT	0.01	1	0.2	30	2	0.001	49260	50000	0.9852
GT	RUTH-LRT	0.01	1	0.2	30	2	0.0001	49147	50000	0.98294
GT	RUTH-LRT	0.01	1	0.2	30	2	1e-05	49032	50000	0.98064
GT	RUTH-LRT	0.01	1	0.2	30	2	1e-06	48859	50000	0.97718
GT	RUTH-LRT	0.01	1	0.2	30	2	1e-07	48695	50000	0.9739
GT	RUTH-LRT	0.01	1	0.2	30	2	1e-08	48492	50000	0.96984
GT	RUTH-LRT	0.01	1	0.2	5	2	0.05	47947	50000	0.95894
GT	RUTH-LRT	0.01	1	0.2	5	2	0.01	47219	50000	0.94438
GT	RUTH-LRT	0.01	1	0.2	5	2	0.001	45995	50000	0.9199
GT	RUTH-LRT	0.01	1	0.2	5	2	0.0001	44732	50000	0.89464
GT	RUTH-LRT	0.01	1	0.2	5	2	1e-05	43555	50000	0.8711
GT	RUTH-LRT	0.01	1	0.2	5	2	1e-06	42358	50000	0.84716
GT	RUTH-LRT	0.01	1	0.2	5	2	1e-07	41208	50000	0.82416
GT	RUTH-LRT	0.01	1	0.2	5	2	1e-08	40081	50000	0.80162
GL	RUTH-LRT	0.01	1	0.2	30	2	0.05	49697	50000	0.99394
GL	RUTH-LRT	0.01	1	0.2	30	2	0.01	49663	50000	0.99326
GL	RUTH-LRT	0.01	1	0.2	30	2	0.001	49575	50000	0.9915
GL	RUTH-LRT	0.01	1	0.2	30	2	0.0001	49485	50000	0.9897
GL	RUTH-LRT	0.01	1	0.2	30	2	1e-05	49374	50000	0.98748
GL	RUTH-LRT	0.01	1	0.2	30	2	1e-06	49276	50000	0.98552
GL	RUTH-LRT	0.01	1	0.2	30	2	1e-07	49170	50000	0.9834
GL	RUTH-LRT	0.01	1	0.2	30	2	1e-08	49047	50000	0.98094
GT	RUTH-Score	0.01	1	0.2	30	2	0.05	48932	50000	0.97864
GT	RUTH-Score	0.01	1	0.2	30	2	0.01	48627	50000	0.97254
GT	RUTH-Score	0.01	1	0.2	30	2	0.001	48202	50000	0.96404
GT	RUTH-Score	0.01	1	0.2	30	2	0.0001	47699	50000	0.95398
GT	RUTH-Score	0.01	1	0.2	30	2	1e-05	47153	50000	0.94306
GT	RUTH-Score	0.01	1	0.2	30	2	1e-06	46531	50000	0.93062
GT	RUTH-Score	0.01	1	0.2	30	2	1e-07	45944	50000	0.91888
GT	RUTH-Score	0.01	1	0.2	30	2	1e-08	45328	50000	0.90656
GL	RUTH-Score	0.01	1	-0.2	30	2	0.05	47942	50000	0.95884
GL	RUTH-Score	0.01	1	-0.2	30	2	0.01	47630	50000	0.9526
GL	RUTH-Score	0.01	1	-0.2	30	2	0.001	47298	50000	0.94596
GL	RUTH-Score	0.01	1	-0.2	30	2	0.0001	47006	50000	0.94012
GL	RUTH-Score	0.01	1	-0.2	30	2	1e-05	46735	50000	0.9347
GL	RUTH-Score	0.01	1	-0.2	30	2	1e-06	46522	50000	0.93044
GL	RUTH-Score	0.01	1	-0.2	30	2	1e-07	46328	50000	0.92656
GL	RUTH-Score	0.01	1	-0.2	30	2	1e-08	46130	50000	0.9226
GL	RUTH-Score	0.01	1	0.2	30	2	0.05	49255	50000	0.9851
GL	RUTH-Score	0.01	1	0.2	30	2	0.01	48988	50000	0.97976
GL	RUTH-Score	0.01	1	0.2	30	2	0.001	48524	50000	0.97048
GL	RUTH-Score	0.01	1	0.2	30	2	0.0001	48022	50000	0.96044
GL	RUTH-Score	0.01	1	0.2	30	2	1e-05	47527	50000	0.95054
GL	RUTH-Score	0.01	1	0.2	30	2	1e-06	46995	50000	0.9399
GL	RUTH-Score	0.01	1	0.2	30	2	1e-07	46413	50000	0.92826
GL	RUTH-Score	0.01	1	0.2	30	2	1e-08	45879	50000	0.91758
GT	RUTH-LRT	0.1	1	0.2	5	2	0.05	47919	50000	0.95838
GT	RUTH-LRT	0.1	1	0.2	5	2	0.01	47187	50000	0.94374
GT	RUTH-LRT	0.1	1	0.2	5	2	0.001	46011	50000	0.92022
GT	RUTH-LRT	0.1	1	0.2	5	2	0.0001	44795	50000	0.8959
GT	RUTH-LRT	0.1	1	0.2	5	2	1e-05	43574	50000	0.87148
GT	RUTH-LRT	0.1	1	0.2	5	2	1e-06	42406	50000	0.84812
GT	RUTH-LRT	0.1	1	0.2	5	2	1e-07	41209	50000	0.82418
GT	RUTH-LRT	0.1	1	0.2	5	2	1e-08	40061	50000	0.80122
GL	RUTH-LRT	0.01	1	-0.2	5	2	0.05	46105	50000	0.9221
GL	RUTH-LRT	0.01	1	-0.2	5	2	0.01	45164	50000	0.90328
GL	RUTH-LRT	0.01	1	-0.2	5	2	0.001	44143	50000	0.88286
GL	RUTH-LRT	0.01	1	-0.2	5	2	0.0001	43290	50000	0.8658
GL	RUTH-LRT	0.01	1	-0.2	5	2	1e-05	42556	50000	0.85112
GL	RUTH-LRT	0.01	1	-0.2	5	2	1e-06	41906	50000	0.83812
GL	RUTH-LRT	0.01	1	-0.2	5	2	1e-07	41311	50000	0.82622
GL	RUTH-LRT	0.01	1	-0.2	5	2	1e-08	40818	50000	0.81636
GL	RUTH-LRT	0.01	1	0.2	5	2	0.05	49495	50000	0.9899
GL	RUTH-LRT	0.01	1	0.2	5	2	0.01	49329	50000	0.98658
GL	RUTH-LRT	0.01	1	0.2	5	2	0.001	49076	50000	0.98152
GL	RUTH-LRT	0.01	1	0.2	5	2	0.0001	48776	50000	0.97552
GL	RUTH-LRT	0.01	1	0.2	5	2	1e-05	48443	50000	0.96886
GL	RUTH-LRT	0.01	1	0.2	5	2	1e-06	48066	50000	0.96132
GL	RUTH-LRT	0.01	1	0.2	5	2	1e-07	47661	50000	0.95322
GL	RUTH-LRT	0.01	1	0.2	5	2	1e-08	47205	50000	0.9441
GT	RUTH-Score	0.01	1	0.2	5	2	0.05	46732	50000	0.93464
GT	RUTH-Score	0.01	1	0.2	5	2	0.01	45532	50000	0.91064
GT	RUTH-Score	0.01	1	0.2	5	2	0.001	43880	50000	0.8776
GT	RUTH-Score	0.01	1	0.2	5	2	0.0001	42334	50000	0.84668
GT	RUTH-Score	0.01	1	0.2	5	2	1e-05	40780	50000	0.8156
GT	RUTH-Score	0.01	1	0.2	5	2	1e-06	39420	50000	0.7884
GT	RUTH-Score	0.01	1	0.2	5	2	1e-07	38350	50000	0.767
GT	RUTH-Score	0.01	1	0.2	5	2	1e-08	37342	50000	0.74684
GL	RUTH-Score	0.01	1	-0.2	5	2	0.05	46162	50000	0.92324
GL	RUTH-Score	0.01	1	-0.2	5	2	0.01	45530	50000	0.9106
GL	RUTH-Score	0.01	1	-0.2	5	2	0.001	44775	50000	0.8955
GL	RUTH-Score	0.01	1	-0.2	5	2	0.0001	44184	50000	0.88368
GL	RUTH-Score	0.01	1	-0.2	5	2	1e-05	43626	50000	0.87252
GL	RUTH-Score	0.01	1	-0.2	5	2	1e-06	43154	50000	0.86308
GL	RUTH-Score	0.01	1	-0.2	5	2	1e-07	42673	50000	0.85346
GL	RUTH-Score	0.01	1	-0.2	5	2	1e-08	42207	50000	0.84414
GL	RUTH-Score	0.01	1	0.2	5	2	0.05	48467	50000	0.96934
GL	RUTH-Score	0.01	1	0.2	5	2	0.01	47946	50000	0.95892
GL	RUTH-Score	0.01	1	0.2	5	2	0.001	47121	50000	0.94242
GL	RUTH-Score	0.01	1	0.2	5	2	0.0001	46298	50000	0.92596
GL	RUTH-Score	0.01	1	0.2	5	2	1e-05	45472	50000	0.90944
GL	RUTH-Score	0.01	1	0.2	5	2	1e-06	44680	50000	0.8936
GL	RUTH-Score	0.01	1	0.2	5	2	1e-07	43798	50000	0.87596
GL	RUTH-Score	0.01	1	0.2	5	2	1e-08	42868	50000	0.85736
GT	RUTH-LRT	0.01	1	0.5	30	2	0.05	49534	50000	0.99068
GT	RUTH-LRT	0.01	1	0.5	30	2	0.01	49488	50000	0.98976
GT	RUTH-LRT	0.01	1	0.5	30	2	0.001	49470	50000	0.9894
GT	RUTH-LRT	0.01	1	0.5	30	2	0.0001	49451	50000	0.98902
GT	RUTH-LRT	0.01	1	0.5	30	2	1e-05	49431	50000	0.98862
GT	RUTH-LRT	0.01	1	0.5	30	2	1e-06	49418	50000	0.98836
GT	RUTH-LRT	0.01	1	0.5	30	2	1e-07	49406	50000	0.98812
GT	RUTH-LRT	0.01	1	0.5	30	2	1e-08	49391	50000	0.98782
GT	RUTH-LRT	0.01	1	-0.5	5	2	0.05	47615	50000	0.9523
GT	RUTH-LRT	0.01	1	-0.5	5	2	0.01	46882	50000	0.93764
GT	RUTH-LRT	0.01	1	-0.5	5	2	0.001	46155	50000	0.9231
GT	RUTH-LRT	0.01	1	-0.5	5	2	0.0001	45320	50000	0.9064
GT	RUTH-LRT	0.01	1	-0.5	5	2	1e-05	44582	50000	0.89164
GT	RUTH-LRT	0.01	1	-0.5	5	2	1e-06	44017	50000	0.88034
GT	RUTH-LRT	0.01	1	-0.5	5	2	1e-07	43550	50000	0.871
GT	RUTH-LRT	0.01	1	-0.5	5	2	1e-08	43134	50000	0.86268
GL	RUTH-LRT	0.01	1	-0.5	30	2	0.05	48228	50000	0.96456
GL	RUTH-LRT	0.01	1	-0.5	30	2	0.01	47726	50000	0.95452
GL	RUTH-LRT	0.01	1	-0.5	30	2	0.001	47108	50000	0.94216
GL	RUTH-LRT	0.01	1	-0.5	30	2	0.0001	46601	50000	0.93202
GL	RUTH-LRT	0.01	1	-0.5	30	2	1e-05	46144	50000	0.92288
GL	RUTH-LRT	0.01	1	-0.5	30	2	1e-06	45756	50000	0.91512
GL	RUTH-LRT	0.01	1	-0.5	30	2	1e-07	45423	50000	0.90846
GL	RUTH-LRT	0.01	1	-0.5	30	2	1e-08	45045	50000	0.9009
GL	RUTH-LRT	0.01	1	0.5	30	2	0.05	49777	50000	0.99554
GL	RUTH-LRT	0.01	1	0.5	30	2	0.01	49772	50000	0.99544
GL	RUTH-LRT	0.01	1	0.5	30	2	0.001	49747	50000	0.99494
GL	RUTH-LRT	0.01	1	0.5	30	2	0.0001	49719	50000	0.99438
GL	RUTH-LRT	0.01	1	0.5	30	2	1e-05	49700	50000	0.994
GL	RUTH-LRT	0.01	1	0.5	30	2	1e-06	49680	50000	0.9936
GL	RUTH-LRT	0.01	1	0.5	30	2	1e-07	49664	50000	0.99328
GL	RUTH-LRT	0.01	1	0.5	30	2	1e-08	49639	50000	0.99278
GT	RUTH-Score	0.01	1	-0.5	30	2	0.05	48171	50000	0.96342
GT	RUTH-Score	0.01	1	-0.5	30	2	0.01	47903	50000	0.95806
GT	RUTH-Score	0.01	1	-0.5	30	2	0.001	47598	50000	0.95196
GT	RUTH-Score	0.01	1	-0.5	30	2	0.0001	47370	50000	0.9474
GT	RUTH-Score	0.01	1	-0.5	30	2	1e-05	47152	50000	0.94304
GT	RUTH-Score	0.01	1	-0.5	30	2	1e-06	46958	50000	0.93916
GT	RUTH-Score	0.01	1	-0.5	30	2	1e-07	46809	50000	0.93618
GT	RUTH-Score	0.01	1	-0.5	30	2	1e-08	46664	50000	0.93328
GT	RUTH-Score	0.01	1	0.5	30	2	0.05	49215	50000	0.9843
GT	RUTH-Score	0.01	1	0.5	30	2	0.01	49141	50000	0.98282
GT	RUTH-Score	0.01	1	0.5	30	2	0.001	49057	50000	0.98114
GT	RUTH-Score	0.01	1	0.5	30	2	0.0001	48941	50000	0.97882
GT	RUTH-Score	0.01	1	0.5	30	2	1e-05	48804	50000	0.97608
GT	RUTH-Score	0.01	1	0.5	30	2	1e-06	48644	50000	0.97288
GT	RUTH-Score	0.01	1	0.5	30	2	1e-07	48466	50000	0.96932
GT	RUTH-Score	0.01	1	0.5	30	2	1e-08	48285	50000	0.9657
GL	RUTH-Score	0.01	1	-0.5	30	2	0.05	48195	50000	0.9639
GL	RUTH-Score	0.01	1	-0.5	30	2	0.01	47916	50000	0.95832
GL	RUTH-Score	0.01	1	-0.5	30	2	0.001	47633	50000	0.95266
GL	RUTH-Score	0.01	1	-0.5	30	2	0.0001	47393	50000	0.94786
GL	RUTH-Score	0.01	1	-0.5	30	2	1e-05	47157	50000	0.94314
GL	RUTH-Score	0.01	1	-0.5	30	2	1e-06	46959	50000	0.93918
GL	RUTH-Score	0.01	1	-0.5	30	2	1e-07	46768	50000	0.93536
GL	RUTH-Score	0.01	1	-0.5	30	2	1e-08	46606	50000	0.93212
GL	RUTH-Score	0.01	1	0.5	30	2	0.05	49539	50000	0.99078
GL	RUTH-Score	0.01	1	0.5	30	2	0.01	49420	50000	0.9884
GL	RUTH-Score	0.01	1	0.5	30	2	0.001	49284	50000	0.98568
GL	RUTH-Score	0.01	1	0.5	30	2	0.0001	49130	50000	0.9826
GL	RUTH-Score	0.01	1	0.5	30	2	1e-05	48976	50000	0.97952
GL	RUTH-Score	0.01	1	0.5	30	2	1e-06	48816	50000	0.97632
GL	RUTH-Score	0.01	1	0.5	30	2	1e-07	48639	50000	0.97278
GL	RUTH-Score	0.01	1	0.5	30	2	1e-08	48437	50000	0.96874
GT	RUTH-LRT	0.01	1	0.5	5	2	0.05	49163	50000	0.98326
GT	RUTH-LRT	0.01	1	0.5	5	2	0.01	49030	50000	0.9806
GT	RUTH-LRT	0.01	1	0.5	5	2	0.001	48853	50000	0.97706
GT	RUTH-LRT	0.01	1	0.5	5	2	0.0001	48700	50000	0.974
GT	RUTH-LRT	0.01	1	0.5	5	2	1e-05	48524	50000	0.97048
GT	RUTH-LRT	0.01	1	0.5	5	2	1e-06	48344	50000	0.96688
GT	RUTH-LRT	0.01	1	0.5	5	2	1e-07	48165	50000	0.9633
GT	RUTH-LRT	0.01	1	0.5	5	2	1e-08	47988	50000	0.95976
GT	RUTH-LRT	0.1	1	0.5	5	2	0.05	49062	50000	0.98124
GT	RUTH-LRT	0.1	1	0.5	5	2	0.01	48982	50000	0.97964
GT	RUTH-LRT	0.1	1	0.5	5	2	0.001	48826	50000	0.97652
GT	RUTH-LRT	0.1	1	0.5	5	2	0.0001	48670	50000	0.9734
GT	RUTH-LRT	0.1	1	0.5	5	2	1e-05	48512	50000	0.97024
GT	RUTH-LRT	0.1	1	0.5	5	2	1e-06	48334	50000	0.96668
GT	RUTH-LRT	0.1	1	0.5	5	2	1e-07	48142	50000	0.96284
GT	RUTH-LRT	0.1	1	0.5	5	2	1e-08	47974	50000	0.95948
GL	RUTH-LRT	0.01	1	-0.5	5	2	0.05	46604	50000	0.93208
GL	RUTH-LRT	0.01	1	-0.5	5	2	0.01	45736	50000	0.91472
GL	RUTH-LRT	0.01	1	-0.5	5	2	0.001	44861	50000	0.89722
GL	RUTH-LRT	0.01	1	-0.5	5	2	0.0001	44119	50000	0.88238
GL	RUTH-LRT	0.01	1	-0.5	5	2	1e-05	43512	50000	0.87024
GL	RUTH-LRT	0.01	1	-0.5	5	2	1e-06	42956	50000	0.85912
GL	RUTH-LRT	0.01	1	-0.5	5	2	1e-07	42440	50000	0.8488
GL	RUTH-LRT	0.01	1	-0.5	5	2	1e-08	41951	50000	0.83902
GL	RUTH-LRT	0.01	1	0.5	5	2	0.05	49728	50000	0.99456
GL	RUTH-LRT	0.01	1	0.5	5	2	0.01	49690	50000	0.9938
GL	RUTH-LRT	0.01	1	0.5	5	2	0.001	49631	50000	0.99262
GL	RUTH-LRT	0.01	1	0.5	5	2	0.0001	49573	50000	0.99146
GL	RUTH-LRT	0.01	1	0.5	5	2	1e-05	49529	50000	0.99058
GL	RUTH-LRT	0.01	1	0.5	5	2	1e-06	49482	50000	0.98964
GL	RUTH-LRT	0.01	1	0.5	5	2	1e-07	49441	50000	0.98882
GL	RUTH-LRT	0.01	1	0.5	5	2	1e-08	49394	50000	0.98788
GT	RUTH-Score	0.01	1	-0.5	5	2	0.05	47571	50000	0.95142
GT	RUTH-Score	0.01	1	-0.5	5	2	0.01	47139	50000	0.94278
GT	RUTH-Score	0.01	1	-0.5	5	2	0.001	46739	50000	0.93478
GT	RUTH-Score	0.01	1	-0.5	5	2	0.0001	46360	50000	0.9272
GT	RUTH-Score	0.01	1	-0.5	5	2	1e-05	46033	50000	0.92066
GT	RUTH-Score	0.01	1	-0.5	5	2	1e-06	45683	50000	0.91366
GT	RUTH-Score	0.01	1	-0.5	5	2	1e-07	45332	50000	0.90664
GT	RUTH-Score	0.01	1	-0.5	5	2	1e-08	44967	50000	0.89934
GL	RUTH-Score	0.01	1	-0.5	5	2	0.05	46629	50000	0.93258
GL	RUTH-Score	0.01	1	-0.5	5	2	0.01	46060	50000	0.9212
GL	RUTH-Score	0.01	1	-0.5	5	2	0.001	45412	50000	0.90824
GL	RUTH-Score	0.01	1	-0.5	5	2	0.0001	44891	50000	0.89782
GL	RUTH-Score	0.01	1	-0.5	5	2	1e-05	44425	50000	0.8885
GL	RUTH-Score	0.01	1	-0.5	5	2	1e-06	44000	50000	0.88
GL	RUTH-Score	0.01	1	-0.5	5	2	1e-07	43620	50000	0.8724
GL	RUTH-Score	0.01	1	-0.5	5	2	1e-08	43256	50000	0.86512
GL	RUTH-Score	0.01	1	0.5	5	2	0.05	49188	50000	0.98376
GL	RUTH-Score	0.01	1	0.5	5	2	0.01	48981	50000	0.97962
GL	RUTH-Score	0.01	1	0.5	5	2	0.001	48664	50000	0.97328
GL	RUTH-Score	0.01	1	0.5	5	2	0.0001	48374	50000	0.96748
GL	RUTH-Score	0.01	1	0.5	5	2	1e-05	48074	50000	0.96148
GL	RUTH-Score	0.01	1	0.5	5	2	1e-06	47780	50000	0.9556
GL	RUTH-Score	0.01	1	0.5	5	2	1e-07	47483	50000	0.94966
GL	RUTH-Score	0.01	1	0.5	5	2	1e-08	47192	50000	0.94384
GT	RUTH-LRT	0.01	2	0.001	30	2	0.05	2961	50000	0.05922
GT	RUTH-LRT	0.01	2	0.001	30	2	0.01	635	50000	0.0127
GT	RUTH-LRT	0.01	2	0.001	30	2	0.001	68	50000	0.00136
GT	RUTH-LRT	0.01	2	0.001	30	2	0.0001	9	50000	0.00018
GT	RUTH-LRT	0.01	2	0.001	30	2	1e-05	1	50000	2e-05
GT	RUTH-LRT	0.01	2	0.001	30	2	1e-06	0	50000	0
GT	RUTH-LRT	0.01	2	0.001	30	2	1e-07	0	50000	0
GT	RUTH-LRT	0.01	2	0.001	30	2	1e-08	0	50000	0
GT	RUTH-LRT	0.01	2	-0.001	5	2	0.05	24287	50000	0.48574
GT	RUTH-LRT	0.01	2	-0.001	5	2	0.01	14949	50000	0.29898
GT	RUTH-LRT	0.01	2	-0.001	5	2	0.001	6724	50000	0.13448
GT	RUTH-LRT	0.01	2	-0.001	5	2	0.0001	2654	50000	0.05308
GT	RUTH-LRT	0.01	2	-0.001	5	2	1e-05	966	50000	0.01932
GT	RUTH-LRT	0.01	2	-0.001	5	2	1e-06	331	50000	0.00662
GT	RUTH-LRT	0.01	2	-0.001	5	2	1e-07	117	50000	0.00234
GT	RUTH-LRT	0.01	2	-0.001	5	2	1e-08	39	50000	0.00078
GL	RUTH-LRT	0.01	2	-0.001	30	2	0.05	2391	50000	0.04782
GL	RUTH-LRT	0.01	2	-0.001	30	2	0.01	435	50000	0.0087
GL	RUTH-LRT	0.01	2	-0.001	30	2	0.001	47	50000	0.00094
GL	RUTH-LRT	0.01	2	-0.001	30	2	0.0001	5	50000	0.0001
GL	RUTH-LRT	0.01	2	-0.001	30	2	1e-05	0	50000	0
GL	RUTH-LRT	0.01	2	-0.001	30	2	1e-06	0	50000	0
GL	RUTH-LRT	0.01	2	-0.001	30	2	1e-07	0	50000	0
GL	RUTH-LRT	0.01	2	-0.001	30	2	1e-08	0	50000	0
GL	RUTH-LRT	0.01	2	0.001	30	2	0.05	2433	50000	0.04866
GL	RUTH-LRT	0.01	2	0.001	30	2	0.01	468	50000	0.00936
GL	RUTH-LRT	0.01	2	0.001	30	2	0.001	44	50000	0.00088
GL	RUTH-LRT	0.01	2	0.001	30	2	0.0001	2	50000	4e-05
GL	RUTH-LRT	0.01	2	0.001	30	2	1e-05	0	50000	0
GL	RUTH-LRT	0.01	2	0.001	30	2	1e-06	0	50000	0
GL	RUTH-LRT	0.01	2	0.001	30	2	1e-07	0	50000	0
GL	RUTH-LRT	0.01	2	0.001	30	2	1e-08	0	50000	0
GT	RUTH-Score	0.01	2	-0.001	30	2	0.05	3665	50000	0.0733
GT	RUTH-Score	0.01	2	-0.001	30	2	0.01	1016	50000	0.02032
GT	RUTH-Score	0.01	2	-0.001	30	2	0.001	195	50000	0.0039
GT	RUTH-Score	0.01	2	-0.001	30	2	0.0001	55	50000	0.0011
GT	RUTH-Score	0.01	2	-0.001	30	2	1e-05	20	50000	0.0004
GT	RUTH-Score	0.01	2	-0.001	30	2	1e-06	6	50000	0.00012
GT	RUTH-Score	0.01	2	-0.001	30	2	1e-07	4	50000	8e-05
GT	RUTH-Score	0.01	2	-0.001	30	2	1e-08	1	50000	2e-05
GT	RUTH-Score	0.01	2	0.001	30	2	0.05	3176	50000	0.06352
GT	RUTH-Score	0.01	2	0.001	30	2	0.01	835	50000	0.0167
GT	RUTH-Score	0.01	2	0.001	30	2	0.001	139	50000	0.00278
GT	RUTH-Score	0.01	2	0.001	30	2	0.0001	32	50000	0.00064
GT	RUTH-Score	0.01	2	0.001	30	2	1e-05	5	50000	0.0001
GT	RUTH-Score	0.01	2	0.001	30	2	1e-06	1	50000	2e-05
GT	RUTH-Score	0.01	2	0.001	30	2	1e-07	0	50000	0
GT	RUTH-Score	0.01	2	0.001	30	2	1e-08	0	50000	0
GL	RUTH-Score	0.01	2	-0.001	30	2	0.05	2380	50000	0.0476
GL	RUTH-Score	0.01	2	-0.001	30	2	0.01	508	50000	0.01016
GL	RUTH-Score	0.01	2	-0.001	30	2	0.001	73	50000	0.00146
GL	RUTH-Score	0.01	2	-0.001	30	2	0.0001	16	50000	0.00032
GL	RUTH-Score	0.01	2	-0.001	30	2	1e-05	6	50000	0.00012
GL	RUTH-Score	0.01	2	-0.001	30	2	1e-06	1	50000	2e-05
GL	RUTH-Score	0.01	2	-0.001	30	2	1e-07	0	50000	0
GL	RUTH-Score	0.01	2	-0.001	30	2	1e-08	0	50000	0
GL	RUTH-Score	0.01	2	0.001	30	2	0.05	2321	50000	0.04642
GL	RUTH-Score	0.01	2	0.001	30	2	0.01	484	50000	0.00968
GL	RUTH-Score	0.01	2	0.001	30	2	0.001	51	50000	0.00102
GL	RUTH-Score	0.01	2	0.001	30	2	0.0001	4	50000	8e-05
GL	RUTH-Score	0.01	2	0.001	30	2	1e-05	2	50000	4e-05
GL	RUTH-Score	0.01	2	0.001	30	2	1e-06	1	50000	2e-05
GL	RUTH-Score	0.01	2	0.001	30	2	1e-07	0	50000	0
GL	RUTH-Score	0.01	2	0.001	30	2	1e-08	0	50000	0
GT	RUTH-LRT	0.01	2	0.001	5	2	0.05	24949	50000	0.49898
GT	RUTH-LRT	0.01	2	0.001	5	2	0.01	15803	50000	0.31606
GT	RUTH-LRT	0.01	2	0.001	5	2	0.001	7327	50000	0.14654
GT	RUTH-LRT	0.01	2	0.001	5	2	0.0001	3073	50000	0.06146
GT	RUTH-LRT	0.01	2	0.001	5	2	1e-05	1150	50000	0.023
GT	RUTH-LRT	0.01	2	0.001	5	2	1e-06	408	50000	0.00816
GT	RUTH-LRT	0.01	2	0.001	5	2	1e-07	139	50000	0.00278
GT	RUTH-LRT	0.01	2	0.001	5	2	1e-08	40	50000	0.0008
GT	RUTH-LRT	0.01	2	-0.002	30	2	0.05	3704	50000	0.07408
GT	RUTH-LRT	0.01	2	-0.002	30	2	0.01	914	50000	0.01828
GT	RUTH-LRT	0.01	2	-0.002	30	2	0.001	111	50000	0.00222
GT	RUTH-LRT	0.01	2	-0.002	30	2	0.0001	11	50000	0.00022
GT	RUTH-LRT	0.01	2	-0.002	30	2	1e-05	1	50000	2e-05
GT	RUTH-LRT	0.01	2	-0.002	30	2	1e-06	0	50000	0
GT	RUTH-LRT	0.01	2	-0.002	30	2	1e-07	0	50000	0
GT	RUTH-LRT	0.01	2	-0.002	30	2	1e-08	0	50000	0
GL	RUTH-LRT	0.01	2	-0.001	5	2	0.05	2596	50000	0.05192
GL	RUTH-LRT	0.01	2	-0.001	5	2	0.01	505	50000	0.0101
GL	RUTH-LRT	0.01	2	-0.001	5	2	0.001	53	50000	0.00106
GL	RUTH-LRT	0.01	2	-0.001	5	2	0.0001	8	50000	0.00016
GL	RUTH-LRT	0.01	2	-0.001	5	2	1e-05	1	50000	2e-05
GL	RUTH-LRT	0.01	2	-0.001	5	2	1e-06	0	50000	0
GL	RUTH-LRT	0.01	2	-0.001	5	2	1e-07	0	50000	0
GL	RUTH-LRT	0.01	2	-0.001	5	2	1e-08	0	50000	0
GL	RUTH-LRT	0.01	2	0.001	5	2	0.05	2840	50000	0.0568
GL	RUTH-LRT	0.01	2	0.001	5	2	0.01	615	50000	0.0123
GL	RUTH-LRT	0.01	2	0.001	5	2	0.001	77	50000	0.00154
GL	RUTH-LRT	0.01	2	0.001	5	2	0.0001	13	50000	0.00026
GL	RUTH-LRT	0.01	2	0.001	5	2	1e-05	1	50000	2e-05
GL	RUTH-LRT	0.01	2	0.001	5	2	1e-06	1	50000	2e-05
GL	RUTH-LRT	0.01	2	0.001	5	2	1e-07	0	50000	0
GL	RUTH-LRT	0.01	2	0.001	5	2	1e-08	0	50000	0
GT	RUTH-Score	0.01	2	-0.001	5	2	0.05	24676	50000	0.49352
GT	RUTH-Score	0.01	2	-0.001	5	2	0.01	15441	50000	0.30882
GT	RUTH-Score	0.01	2	-0.001	5	2	0.001	7066	50000	0.14132
GT	RUTH-Score	0.01	2	-0.001	5	2	0.0001	2846	50000	0.05692
GT	RUTH-Score	0.01	2	-0.001	5	2	1e-05	1070	50000	0.0214
GT	RUTH-Score	0.01	2	-0.001	5	2	1e-06	392	50000	0.00784
GT	RUTH-Score	0.01	2	-0.001	5	2	1e-07	146	50000	0.00292
GT	RUTH-Score	0.01	2	-0.001	5	2	1e-08	50	50000	0.001
GT	RUTH-Score	0.01	2	0.001	5	2	0.05	25298	50000	0.50596
GT	RUTH-Score	0.01	2	0.001	5	2	0.01	16250	50000	0.325
GT	RUTH-Score	0.01	2	0.001	5	2	0.001	7591	50000	0.15182
GT	RUTH-Score	0.01	2	0.001	5	2	0.0001	3193	50000	0.06386
GT	RUTH-Score	0.01	2	0.001	5	2	1e-05	1208	50000	0.02416
GT	RUTH-Score	0.01	2	0.001	5	2	1e-06	430	50000	0.0086
GT	RUTH-Score	0.01	2	0.001	5	2	1e-07	144	50000	0.00288
GT	RUTH-Score	0.01	2	0.001	5	2	1e-08	43	50000	0.00086
GL	RUTH-Score	0.01	2	-0.001	5	2	0.05	2388	50000	0.04776
GL	RUTH-Score	0.01	2	-0.001	5	2	0.01	469	50000	0.00938
GL	RUTH-Score	0.01	2	-0.001	5	2	0.001	48	50000	0.00096
GL	RUTH-Score	0.01	2	-0.001	5	2	0.0001	6	50000	0.00012
GL	RUTH-Score	0.01	2	-0.001	5	2	1e-05	2	50000	4e-05
GL	RUTH-Score	0.01	2	-0.001	5	2	1e-06	0	50000	0
GL	RUTH-Score	0.01	2	-0.001	5	2	1e-07	0	50000	0
GL	RUTH-Score	0.01	2	-0.001	5	2	1e-08	0	50000	0
GL	RUTH-Score	0.01	2	0.001	5	2	0.05	2575	50000	0.0515
GL	RUTH-Score	0.01	2	0.001	5	2	0.01	539	50000	0.01078
GL	RUTH-Score	0.01	2	0.001	5	2	0.001	67	50000	0.00134
GL	RUTH-Score	0.01	2	0.001	5	2	0.0001	8	50000	0.00016
GL	RUTH-Score	0.01	2	0.001	5	2	1e-05	1	50000	2e-05
GL	RUTH-Score	0.01	2	0.001	5	2	1e-06	1	50000	2e-05
GL	RUTH-Score	0.01	2	0.001	5	2	1e-07	0	50000	0
GL	RUTH-Score	0.01	2	0.001	5	2	1e-08	0	50000	0
GT	RUTH-LRT	0.01	2	0.002	30	2	0.05	2944	50000	0.05888
GT	RUTH-LRT	0.01	2	0.002	30	2	0.01	659	50000	0.01318
GT	RUTH-LRT	0.01	2	0.002	30	2	0.001	80	50000	0.0016
GT	RUTH-LRT	0.01	2	0.002	30	2	0.0001	9	50000	0.00018
GT	RUTH-LRT	0.01	2	0.002	30	2	1e-05	0	50000	0
GT	RUTH-LRT	0.01	2	0.002	30	2	1e-06	0	50000	0
GT	RUTH-LRT	0.01	2	0.002	30	2	1e-07	0	50000	0
GT	RUTH-LRT	0.01	2	0.002	30	2	1e-08	0	50000	0
GT	RUTH-LRT	0.01	2	-0.002	5	2	0.05	24264	50000	0.48528
GT	RUTH-LRT	0.01	2	-0.002	5	2	0.01	14769	50000	0.29538
GT	RUTH-LRT	0.01	2	-0.002	5	2	0.001	6383	50000	0.12766
GT	RUTH-LRT	0.01	2	-0.002	5	2	0.0001	2491	50000	0.04982
GT	RUTH-LRT	0.01	2	-0.002	5	2	1e-05	862	50000	0.01724
GT	RUTH-LRT	0.01	2	-0.002	5	2	1e-06	295	50000	0.0059
GT	RUTH-LRT	0.01	2	-0.002	5	2	1e-07	94	50000	0.00188
GT	RUTH-LRT	0.01	2	-0.002	5	2	1e-08	30	50000	0.0006
GL	RUTH-LRT	0.01	2	-0.002	30	2	0.05	2538	50000	0.05076
GL	RUTH-LRT	0.01	2	-0.002	30	2	0.01	506	50000	0.01012
GL	RUTH-LRT	0.01	2	-0.002	30	2	0.001	51	50000	0.00102
GL	RUTH-LRT	0.01	2	-0.002	30	2	0.0001	6	50000	0.00012
GL	RUTH-LRT	0.01	2	-0.002	30	2	1e-05	0	50000	0
GL	RUTH-LRT	0.01	2	-0.002	30	2	1e-06	0	50000	0
GL	RUTH-LRT	0.01	2	-0.002	30	2	1e-07	0	50000	0
GL	RUTH-LRT	0.01	2	-0.002	30	2	1e-08	0	50000	0
GL	RUTH-LRT	0.01	2	0.002	30	2	0.05	2680	50000	0.0536
GL	RUTH-LRT	0.01	2	0.002	30	2	0.01	576	50000	0.01152
GL	RUTH-LRT	0.01	2	0.002	30	2	0.001	53	50000	0.00106
GL	RUTH-LRT	0.01	2	0.002	30	2	0.0001	5	50000	0.0001
GL	RUTH-LRT	0.01	2	0.002	30	2	1e-05	0	50000	0
GL	RUTH-LRT	0.01	2	0.002	30	2	1e-06	0	50000	0
GL	RUTH-LRT	0.01	2	0.002	30	2	1e-07	0	50000	0
GL	RUTH-LRT	0.01	2	0.002	30	2	1e-08	0	50000	0
GT	RUTH-Score	0.01	2	-0.002	30	2	0.05	4050	50000	0.081
GT	RUTH-Score	0.01	2	-0.002	30	2	0.01	1181	50000	0.02362
GT	RUTH-Score	0.01	2	-0.002	30	2	0.001	238	50000	0.00476
GT	RUTH-Score	0.01	2	-0.002	30	2	0.0001	48	50000	0.00096
GT	RUTH-Score	0.01	2	-0.002	30	2	1e-05	14	50000	0.00028
GT	RUTH-Score	0.01	2	-0.002	30	2	1e-06	1	50000	2e-05
GT	RUTH-Score	0.01	2	-0.002	30	2	1e-07	1	50000	2e-05
GT	RUTH-Score	0.01	2	-0.002	30	2	1e-08	0	50000	0
GT	RUTH-Score	0.01	2	0.002	30	2	0.05	3137	50000	0.06274
GT	RUTH-Score	0.01	2	0.002	30	2	0.01	838	50000	0.01676
GT	RUTH-Score	0.01	2	0.002	30	2	0.001	145	50000	0.0029
GT	RUTH-Score	0.01	2	0.002	30	2	0.0001	43	50000	0.00086
GT	RUTH-Score	0.01	2	0.002	30	2	1e-05	13	50000	0.00026
GT	RUTH-Score	0.01	2	0.002	30	2	1e-06	3	50000	6e-05
GT	RUTH-Score	0.01	2	0.002	30	2	1e-07	1	50000	2e-05
GT	RUTH-Score	0.01	2	0.002	30	2	1e-08	0	50000	0
GL	RUTH-Score	0.01	2	-0.002	30	2	0.05	2595	50000	0.0519
GL	RUTH-Score	0.01	2	-0.002	30	2	0.01	596	50000	0.01192
GL	RUTH-Score	0.01	2	-0.002	30	2	0.001	90	50000	0.0018
GL	RUTH-Score	0.01	2	-0.002	30	2	0.0001	16	50000	0.00032
GL	RUTH-Score	0.01	2	-0.002	30	2	1e-05	3	50000	6e-05
GL	RUTH-Score	0.01	2	-0.002	30	2	1e-06	1	50000	2e-05
GL	RUTH-Score	0.01	2	-0.002	30	2	1e-07	0	50000	0
GL	RUTH-Score	0.01	2	-0.002	30	2	1e-08	0	50000	0
GL	RUTH-Score	0.01	2	0.002	30	2	0.05	2519	50000	0.05038
GL	RUTH-Score	0.01	2	0.002	30	2	0.01	554	50000	0.01108
GL	RUTH-Score	0.01	2	0.002	30	2	0.001	64	50000	0.00128
GL	RUTH-Score	0.01	2	0.002	30	2	0.0001	14	50000	0.00028
GL	RUTH-Score	0.01	2	0.002	30	2	1e-05	3	50000	6e-05
GL	RUTH-Score	0.01	2	0.002	30	2	1e-06	0	50000	0
GL	RUTH-Score	0.01	2	0.002	30	2	1e-07	0	50000	0
GL	RUTH-Score	0.01	2	0.002	30	2	1e-08	0	50000	0
GT	RUTH-LRT	0.01	2	0.002	5	2	0.05	25120	50000	0.5024
GT	RUTH-LRT	0.01	2	0.002	5	2	0.01	16146	50000	0.32292
GT	RUTH-LRT	0.01	2	0.002	5	2	0.001	7769	50000	0.15538
GT	RUTH-LRT	0.01	2	0.002	5	2	0.0001	3273	50000	0.06546
GT	RUTH-LRT	0.01	2	0.002	5	2	1e-05	1276	50000	0.02552
GT	RUTH-LRT	0.01	2	0.002	5	2	1e-06	470	50000	0.0094
GT	RUTH-LRT	0.01	2	0.002	5	2	1e-07	167	50000	0.00334
GT	RUTH-LRT	0.01	2	0.002	5	2	1e-08	53	50000	0.00106
GT	RUTH-LRT	0.01	2	-0.005	30	2	0.05	4819	50000	0.09638
GT	RUTH-LRT	0.01	2	-0.005	30	2	0.01	1340	50000	0.0268
GT	RUTH-LRT	0.01	2	-0.005	30	2	0.001	200	50000	0.004
GT	RUTH-LRT	0.01	2	-0.005	30	2	0.0001	27	50000	0.00054
GT	RUTH-LRT	0.01	2	-0.005	30	2	1e-05	3	50000	6e-05
GT	RUTH-LRT	0.01	2	-0.005	30	2	1e-06	0	50000	0
GT	RUTH-LRT	0.01	2	-0.005	30	2	1e-07	0	50000	0
GT	RUTH-LRT	0.01	2	-0.005	30	2	1e-08	0	50000	0
GL	RUTH-LRT	0.01	2	-0.002	5	2	0.05	2425	50000	0.0485
GL	RUTH-LRT	0.01	2	-0.002	5	2	0.01	492	50000	0.00984
GL	RUTH-LRT	0.01	2	-0.002	5	2	0.001	50	50000	0.001
GL	RUTH-LRT	0.01	2	-0.002	5	2	0.0001	7	50000	0.00014
GL	RUTH-LRT	0.01	2	-0.002	5	2	1e-05	2	50000	4e-05
GL	RUTH-LRT	0.01	2	-0.002	5	2	1e-06	0	50000	0
GL	RUTH-LRT	0.01	2	-0.002	5	2	1e-07	0	50000	0
GL	RUTH-LRT	0.01	2	-0.002	5	2	1e-08	0	50000	0
GL	RUTH-LRT	0.01	2	0.002	5	2	0.05	2966	50000	0.05932
GL	RUTH-LRT	0.01	2	0.002	5	2	0.01	655	50000	0.0131
GL	RUTH-LRT	0.01	2	0.002	5	2	0.001	83	50000	0.00166
GL	RUTH-LRT	0.01	2	0.002	5	2	0.0001	11	50000	0.00022
GL	RUTH-LRT	0.01	2	0.002	5	2	1e-05	1	50000	2e-05
GL	RUTH-LRT	0.01	2	0.002	5	2	1e-06	0	50000	0
GL	RUTH-LRT	0.01	2	0.002	5	2	1e-07	0	50000	0
GL	RUTH-LRT	0.01	2	0.002	5	2	1e-08	0	50000	0
GT	RUTH-Score	0.01	2	-0.002	5	2	0.05	24584	50000	0.49168
GT	RUTH-Score	0.01	2	-0.002	5	2	0.01	15324	50000	0.30648
GT	RUTH-Score	0.01	2	-0.002	5	2	0.001	6813	50000	0.13626
GT	RUTH-Score	0.01	2	-0.002	5	2	0.0001	2727	50000	0.05454
GT	RUTH-Score	0.01	2	-0.002	5	2	1e-05	985	50000	0.0197
GT	RUTH-Score	0.01	2	-0.002	5	2	1e-06	385	50000	0.0077
GT	RUTH-Score	0.01	2	-0.002	5	2	1e-07	128	50000	0.00256
GT	RUTH-Score	0.01	2	-0.002	5	2	1e-08	41	50000	0.00082
GT	RUTH-Score	0.01	2	0.002	5	2	0.05	25493	50000	0.50986
GT	RUTH-Score	0.01	2	0.002	5	2	0.01	16510	50000	0.3302
GT	RUTH-Score	0.01	2	0.002	5	2	0.001	7960	50000	0.1592
GT	RUTH-Score	0.01	2	0.002	5	2	0.0001	3342	50000	0.06684
GT	RUTH-Score	0.01	2	0.002	5	2	1e-05	1298	50000	0.02596
GT	RUTH-Score	0.01	2	0.002	5	2	1e-06	485	50000	0.0097
GT	RUTH-Score	0.01	2	0.002	5	2	1e-07	172	50000	0.00344
GT	RUTH-Score	0.01	2	0.002	5	2	1e-08	58	50000	0.00116
GL	RUTH-Score	0.01	2	-0.002	5	2	0.05	2262	50000	0.04524
GL	RUTH-Score	0.01	2	-0.002	5	2	0.01	472	50000	0.00944
GL	RUTH-Score	0.01	2	-0.002	5	2	0.001	52	50000	0.00104
GL	RUTH-Score	0.01	2	-0.002	5	2	0.0001	8	50000	0.00016
GL	RUTH-Score	0.01	2	-0.002	5	2	1e-05	2	50000	4e-05
GL	RUTH-Score	0.01	2	-0.002	5	2	1e-06	2	50000	4e-05
GL	RUTH-Score	0.01	2	-0.002	5	2	1e-07	0	50000	0
GL	RUTH-Score	0.01	2	-0.002	5	2	1e-08	0	50000	0
GL	RUTH-Score	0.01	2	0.002	5	2	0.05	2693	50000	0.05386
GL	RUTH-Score	0.01	2	0.002	5	2	0.01	568	50000	0.01136
GL	RUTH-Score	0.01	2	0.002	5	2	0.001	70	50000	0.0014
GL	RUTH-Score	0.01	2	0.002	5	2	0.0001	8	50000	0.00016
GL	RUTH-Score	0.01	2	0.002	5	2	1e-05	0	50000	0
GL	RUTH-Score	0.01	2	0.002	5	2	1e-06	0	50000	0
GL	RUTH-Score	0.01	2	0.002	5	2	1e-07	0	50000	0
GL	RUTH-Score	0.01	2	0.002	5	2	1e-08	0	50000	0
GT	RUTH-LRT	0.01	2	0.005	30	2	0.05	2742	50000	0.05484
GT	RUTH-LRT	0.01	2	0.005	30	2	0.01	590	50000	0.0118
GT	RUTH-LRT	0.01	2	0.005	30	2	0.001	72	50000	0.00144
GT	RUTH-LRT	0.01	2	0.005	30	2	0.0001	9	50000	0.00018
GT	RUTH-LRT	0.01	2	0.005	30	2	1e-05	2	50000	4e-05
GT	RUTH-LRT	0.01	2	0.005	30	2	1e-06	0	50000	0
GT	RUTH-LRT	0.01	2	0.005	30	2	1e-07	0	50000	0
GT	RUTH-LRT	0.01	2	0.005	30	2	1e-08	0	50000	0
GT	RUTH-LRT	0.01	2	-0.005	5	2	0.05	23171	50000	0.46342
GT	RUTH-LRT	0.01	2	-0.005	5	2	0.01	13607	50000	0.27214
GT	RUTH-LRT	0.01	2	-0.005	5	2	0.001	5554	50000	0.11108
GT	RUTH-LRT	0.01	2	-0.005	5	2	0.0001	2015	50000	0.0403
GT	RUTH-LRT	0.01	2	-0.005	5	2	1e-05	646	50000	0.01292
GT	RUTH-LRT	0.01	2	-0.005	5	2	1e-06	225	50000	0.0045
GT	RUTH-LRT	0.01	2	-0.005	5	2	1e-07	60	50000	0.0012
GT	RUTH-LRT	0.01	2	-0.005	5	2	1e-08	19	50000	0.00038
GL	RUTH-LRT	0.01	2	-0.005	30	2	0.05	3084	50000	0.06168
GL	RUTH-LRT	0.01	2	-0.005	30	2	0.01	670	50000	0.0134
GL	RUTH-LRT	0.01	2	-0.005	30	2	0.001	79	50000	0.00158
GL	RUTH-LRT	0.01	2	-0.005	30	2	0.0001	11	50000	0.00022
GL	RUTH-LRT	0.01	2	-0.005	30	2	1e-05	1	50000	2e-05
GL	RUTH-LRT	0.01	2	-0.005	30	2	1e-06	0	50000	0
GL	RUTH-LRT	0.01	2	-0.005	30	2	1e-07	0	50000	0
GL	RUTH-LRT	0.01	2	-0.005	30	2	1e-08	0	50000	0
GL	RUTH-LRT	0.01	2	0.005	30	2	0.05	3221	50000	0.06442
GL	RUTH-LRT	0.01	2	0.005	30	2	0.01	745	50000	0.0149
GL	RUTH-LRT	0.01	2	0.005	30	2	0.001	108	50000	0.00216
GL	RUTH-LRT	0.01	2	0.005	30	2	0.0001	15	50000	0.0003
GL	RUTH-LRT	0.01	2	0.005	30	2	1e-05	2	50000	4e-05
GL	RUTH-LRT	0.01	2	0.005	30	2	1e-06	0	50000	0
GL	RUTH-LRT	0.01	2	0.005	30	2	1e-07	0	50000	0
GL	RUTH-LRT	0.01	2	0.005	30	2	1e-08	0	50000	0
GT	RUTH-Score	0.01	2	-0.005	30	2	0.05	5248	50000	0.10496
GT	RUTH-Score	0.01	2	-0.005	30	2	0.01	1735	50000	0.0347
GT	RUTH-Score	0.01	2	-0.005	30	2	0.001	397	50000	0.00794
GT	RUTH-Score	0.01	2	-0.005	30	2	0.0001	102	50000	0.00204
GT	RUTH-Score	0.01	2	-0.005	30	2	1e-05	31	50000	0.00062
GT	RUTH-Score	0.01	2	-0.005	30	2	1e-06	12	50000	0.00024
GT	RUTH-Score	0.01	2	-0.005	30	2	1e-07	4	50000	8e-05
GT	RUTH-Score	0.01	2	-0.005	30	2	1e-08	1	50000	2e-05
GT	RUTH-Score	0.01	2	0.005	30	2	0.05	2817	50000	0.05634
GT	RUTH-Score	0.01	2	0.005	30	2	0.01	674	50000	0.01348
GT	RUTH-Score	0.01	2	0.005	30	2	0.001	104	50000	0.00208
GT	RUTH-Score	0.01	2	0.005	30	2	0.0001	21	50000	0.00042
GT	RUTH-Score	0.01	2	0.005	30	2	1e-05	8	50000	0.00016
GT	RUTH-Score	0.01	2	0.005	30	2	1e-06	1	50000	2e-05
GT	RUTH-Score	0.01	2	0.005	30	2	1e-07	1	50000	2e-05
GT	RUTH-Score	0.01	2	0.005	30	2	1e-08	1	50000	2e-05
GL	RUTH-Score	0.01	2	-0.005	30	2	0.05	3271	50000	0.06542
GL	RUTH-Score	0.01	2	-0.005	30	2	0.01	830	50000	0.0166
GL	RUTH-Score	0.01	2	-0.005	30	2	0.001	147	50000	0.00294
GL	RUTH-Score	0.01	2	-0.005	30	2	0.0001	34	50000	0.00068
GL	RUTH-Score	0.01	2	-0.005	30	2	1e-05	11	50000	0.00022
GL	RUTH-Score	0.01	2	-0.005	30	2	1e-06	5	50000	0.0001
GL	RUTH-Score	0.01	2	-0.005	30	2	1e-07	3	50000	6e-05
GL	RUTH-Score	0.01	2	-0.005	30	2	1e-08	0	50000	0
GL	RUTH-Score	0.01	2	0.005	30	2	0.05	2838	50000	0.05676
GL	RUTH-Score	0.01	2	0.005	30	2	0.01	606	50000	0.01212
GL	RUTH-Score	0.01	2	0.005	30	2	0.001	81	50000	0.00162
GL	RUTH-Score	0.01	2	0.005	30	2	0.0001	12	50000	0.00024
GL	RUTH-Score	0.01	2	0.005	30	2	1e-05	5	50000	0.0001
GL	RUTH-Score	0.01	2	0.005	30	2	1e-06	0	50000	0
GL	RUTH-Score	0.01	2	0.005	30	2	1e-07	0	50000	0
GL	RUTH-Score	0.01	2	0.005	30	2	1e-08	0	50000	0
GT	RUTH-LRT	0.01	2	0.005	5	2	0.05	25666	50000	0.51332
GT	RUTH-LRT	0.01	2	0.005	5	2	0.01	17360	50000	0.3472
GT	RUTH-LRT	0.01	2	0.005	5	2	0.001	8900	50000	0.178
GT	RUTH-LRT	0.01	2	0.005	5	2	0.0001	4010	50000	0.0802
GT	RUTH-LRT	0.01	2	0.005	5	2	1e-05	1705	50000	0.0341
GT	RUTH-LRT	0.01	2	0.005	5	2	1e-06	636	50000	0.01272
GT	RUTH-LRT	0.01	2	0.005	5	2	1e-07	230	50000	0.0046
GT	RUTH-LRT	0.01	2	0.005	5	2	1e-08	84	50000	0.00168
GT	RUTH-LRT	0.01	2	-0.01	30	2	0.05	7767	50000	0.15534
GT	RUTH-LRT	0.01	2	-0.01	30	2	0.01	2595	50000	0.0519
GT	RUTH-LRT	0.01	2	-0.01	30	2	0.001	455	50000	0.0091
GT	RUTH-LRT	0.01	2	-0.01	30	2	0.0001	67	50000	0.00134
GT	RUTH-LRT	0.01	2	-0.01	30	2	1e-05	11	50000	0.00022
GT	RUTH-LRT	0.01	2	-0.01	30	2	1e-06	5	50000	0.0001
GT	RUTH-LRT	0.01	2	-0.01	30	2	1e-07	1	50000	2e-05
GT	RUTH-LRT	0.01	2	-0.01	30	2	1e-08	1	50000	2e-05
GL	RUTH-LRT	0.01	2	-0.005	5	2	0.05	2306	50000	0.04612
GL	RUTH-LRT	0.01	2	-0.005	5	2	0.01	456	50000	0.00912
GL	RUTH-LRT	0.01	2	-0.005	5	2	0.001	45	50000	0.0009
GL	RUTH-LRT	0.01	2	-0.005	5	2	0.0001	4	50000	8e-05
GL	RUTH-LRT	0.01	2	-0.005	5	2	1e-05	1	50000	2e-05
GL	RUTH-LRT	0.01	2	-0.005	5	2	1e-06	0	50000	0
GL	RUTH-LRT	0.01	2	-0.005	5	2	1e-07	0	50000	0
GL	RUTH-LRT	0.01	2	-0.005	5	2	1e-08	0	50000	0
GL	RUTH-LRT	0.01	2	0.005	5	2	0.05	3736	50000	0.07472
GL	RUTH-LRT	0.01	2	0.005	5	2	0.01	942	50000	0.01884
GL	RUTH-LRT	0.01	2	0.005	5	2	0.001	137	50000	0.00274
GL	RUTH-LRT	0.01	2	0.005	5	2	0.0001	22	50000	0.00044
GL	RUTH-LRT	0.01	2	0.005	5	2	1e-05	5	50000	0.0001
GL	RUTH-LRT	0.01	2	0.005	5	2	1e-06	2	50000	4e-05
GL	RUTH-LRT	0.01	2	0.005	5	2	1e-07	0	50000	0
GL	RUTH-LRT	0.01	2	0.005	5	2	1e-08	0	50000	0
GT	RUTH-Score	0.01	2	-0.005	5	2	0.05	23556	50000	0.47112
GT	RUTH-Score	0.01	2	-0.005	5	2	0.01	14223	50000	0.28446
GT	RUTH-Score	0.01	2	-0.005	5	2	0.001	6073	50000	0.12146
GT	RUTH-Score	0.01	2	-0.005	5	2	0.0001	2386	50000	0.04772
GT	RUTH-Score	0.01	2	-0.005	5	2	1e-05	854	50000	0.01708
GT	RUTH-Score	0.01	2	-0.005	5	2	1e-06	343	50000	0.00686
GT	RUTH-Score	0.01	2	-0.005	5	2	1e-07	127	50000	0.00254
GT	RUTH-Score	0.01	2	-0.005	5	2	1e-08	59	50000	0.00118
GT	RUTH-Score	0.01	2	0.005	5	2	0.05	25968	50000	0.51936
GT	RUTH-Score	0.01	2	0.005	5	2	0.01	17680	50000	0.3536
GT	RUTH-Score	0.01	2	0.005	5	2	0.001	8983	50000	0.17966
GT	RUTH-Score	0.01	2	0.005	5	2	0.0001	3984	50000	0.07968
GT	RUTH-Score	0.01	2	0.005	5	2	1e-05	1641	50000	0.03282
GT	RUTH-Score	0.01	2	0.005	5	2	1e-06	595	50000	0.0119
GT	RUTH-Score	0.01	2	0.005	5	2	1e-07	209	50000	0.00418
GT	RUTH-Score	0.01	2	0.005	5	2	1e-08	78	50000	0.00156
GL	RUTH-Score	0.01	2	-0.005	5	2	0.05	2241	50000	0.04482
GL	RUTH-Score	0.01	2	-0.005	5	2	0.01	472	50000	0.00944
GL	RUTH-Score	0.01	2	-0.005	5	2	0.001	57	50000	0.00114
GL	RUTH-Score	0.01	2	-0.005	5	2	0.0001	7	50000	0.00014
GL	RUTH-Score	0.01	2	-0.005	5	2	1e-05	1	50000	2e-05
GL	RUTH-Score	0.01	2	-0.005	5	2	1e-06	0	50000	0
GL	RUTH-Score	0.01	2	-0.005	5	2	1e-07	0	50000	0
GL	RUTH-Score	0.01	2	-0.005	5	2	1e-08	0	50000	0
GL	RUTH-Score	0.01	2	0.005	5	2	0.05	3333	50000	0.06666
GL	RUTH-Score	0.01	2	0.005	5	2	0.01	791	50000	0.01582
GL	RUTH-Score	0.01	2	0.005	5	2	0.001	113	50000	0.00226
GL	RUTH-Score	0.01	2	0.005	5	2	0.0001	18	50000	0.00036
GL	RUTH-Score	0.01	2	0.005	5	2	1e-05	5	50000	0.0001
GL	RUTH-Score	0.01	2	0.005	5	2	1e-06	1	50000	2e-05
GL	RUTH-Score	0.01	2	0.005	5	2	1e-07	0	50000	0
GL	RUTH-Score	0.01	2	0.005	5	2	1e-08	0	50000	0
GT	RUTH-LRT	0.01	2	0.01	30	2	0.05	3767	50000	0.07534
GT	RUTH-LRT	0.01	2	0.01	30	2	0.01	941	50000	0.01882
GT	RUTH-LRT	0.01	2	0.01	30	2	0.001	114	50000	0.00228
GT	RUTH-LRT	0.01	2	0.01	30	2	0.0001	16	50000	0.00032
GT	RUTH-LRT	0.01	2	0.01	30	2	1e-05	2	50000	4e-05
GT	RUTH-LRT	0.01	2	0.01	30	2	1e-06	0	50000	0
GT	RUTH-LRT	0.01	2	0.01	30	2	1e-07	0	50000	0
GT	RUTH-LRT	0.01	2	0.01	30	2	1e-08	0	50000	0
GT	RUTH-LRT	0.01	2	-0.01	5	2	0.05	22104	50000	0.44208
GT	RUTH-LRT	0.01	2	-0.01	5	2	0.01	12150	50000	0.243
GT	RUTH-LRT	0.01	2	-0.01	5	2	0.001	4659	50000	0.09318
GT	RUTH-LRT	0.01	2	-0.01	5	2	0.0001	1583	50000	0.03166
GT	RUTH-LRT	0.01	2	-0.01	5	2	1e-05	501	50000	0.01002
GT	RUTH-LRT	0.01	2	-0.01	5	2	1e-06	165	50000	0.0033
GT	RUTH-LRT	0.01	2	-0.01	5	2	1e-07	53	50000	0.00106
GT	RUTH-LRT	0.01	2	-0.01	5	2	1e-08	28	50000	0.00056
GL	RUTH-LRT	0.01	2	-0.01	30	2	0.05	4831	50000	0.09662
GL	RUTH-LRT	0.01	2	-0.01	30	2	0.01	1339	50000	0.02678
GL	RUTH-LRT	0.01	2	-0.01	30	2	0.001	194	50000	0.00388
GL	RUTH-LRT	0.01	2	-0.01	30	2	0.0001	22	50000	0.00044
GL	RUTH-LRT	0.01	2	-0.01	30	2	1e-05	4	50000	8e-05
GL	RUTH-LRT	0.01	2	-0.01	30	2	1e-06	1	50000	2e-05
GL	RUTH-LRT	0.01	2	-0.01	30	2	1e-07	1	50000	2e-05
GL	RUTH-LRT	0.01	2	-0.01	30	2	1e-08	0	50000	0
GL	RUTH-LRT	0.01	2	0.01	30	2	0.05	5347	50000	0.10694
GL	RUTH-LRT	0.01	2	0.01	30	2	0.01	1605	50000	0.0321
GL	RUTH-LRT	0.01	2	0.01	30	2	0.001	236	50000	0.00472
GL	RUTH-LRT	0.01	2	0.01	30	2	0.0001	36	50000	0.00072
GL	RUTH-LRT	0.01	2	0.01	30	2	1e-05	8	50000	0.00016
GL	RUTH-LRT	0.01	2	0.01	30	2	1e-06	2	50000	4e-05
GL	RUTH-LRT	0.01	2	0.01	30	2	1e-07	0	50000	0
GL	RUTH-LRT	0.01	2	0.01	30	2	1e-08	0	50000	0
GT	RUTH-Score	0.01	2	-0.01	30	2	0.05	8410	50000	0.1682
GT	RUTH-Score	0.01	2	-0.01	30	2	0.01	3258	50000	0.06516
GT	RUTH-Score	0.01	2	-0.01	30	2	0.001	822	50000	0.01644
GT	RUTH-Score	0.01	2	-0.01	30	2	0.0001	225	50000	0.0045
GT	RUTH-Score	0.01	2	-0.01	30	2	1e-05	61	50000	0.00122
GT	RUTH-Score	0.01	2	-0.01	30	2	1e-06	23	50000	0.00046
GT	RUTH-Score	0.01	2	-0.01	30	2	1e-07	12	50000	0.00024
GT	RUTH-Score	0.01	2	-0.01	30	2	1e-08	6	50000	0.00012
GT	RUTH-Score	0.01	2	0.01	30	2	0.05	3603	50000	0.07206
GT	RUTH-Score	0.01	2	0.01	30	2	0.01	916	50000	0.01832
GT	RUTH-Score	0.01	2	0.01	30	2	0.001	106	50000	0.00212
GT	RUTH-Score	0.01	2	0.01	30	2	0.0001	17	50000	0.00034
GT	RUTH-Score	0.01	2	0.01	30	2	1e-05	4	50000	8e-05
GT	RUTH-Score	0.01	2	0.01	30	2	1e-06	1	50000	2e-05
GT	RUTH-Score	0.01	2	0.01	30	2	1e-07	1	50000	2e-05
GT	RUTH-Score	0.01	2	0.01	30	2	1e-08	0	50000	0
GL	RUTH-Score	0.01	2	-0.01	30	2	0.05	5252	50000	0.10504
GL	RUTH-Score	0.01	2	-0.01	30	2	0.01	1677	50000	0.03354
GL	RUTH-Score	0.01	2	-0.01	30	2	0.001	349	50000	0.00698
GL	RUTH-Score	0.01	2	-0.01	30	2	0.0001	69	50000	0.00138
GL	RUTH-Score	0.01	2	-0.01	30	2	1e-05	23	50000	0.00046
GL	RUTH-Score	0.01	2	-0.01	30	2	1e-06	11	50000	0.00022
GL	RUTH-Score	0.01	2	-0.01	30	2	1e-07	5	50000	0.0001
GL	RUTH-Score	0.01	2	-0.01	30	2	1e-08	2	50000	4e-05
GL	RUTH-Score	0.01	2	0.01	30	2	0.05	4651	50000	0.09302
GL	RUTH-Score	0.01	2	0.01	30	2	0.01	1227	50000	0.02454
GL	RUTH-Score	0.01	2	0.01	30	2	0.001	166	50000	0.00332
GL	RUTH-Score	0.01	2	0.01	30	2	0.0001	21	50000	0.00042
GL	RUTH-Score	0.01	2	0.01	30	2	1e-05	3	50000	6e-05
GL	RUTH-Score	0.01	2	0.01	30	2	1e-06	1	50000	2e-05
GL	RUTH-Score	0.01	2	0.01	30	2	1e-07	0	50000	0
GL	RUTH-Score	0.01	2	0.01	30	2	1e-08	0	50000	0
GT	RUTH-LRT	0.01	2	0.01	5	2	0.05	26814	50000	0.53628
GT	RUTH-LRT	0.01	2	0.01	5	2	0.01	19394	50000	0.38788
GT	RUTH-LRT	0.01	2	0.01	5	2	0.001	11081	50000	0.22162
GT	RUTH-LRT	0.01	2	0.01	5	2	0.0001	5612	50000	0.11224
GT	RUTH-LRT	0.01	2	0.01	5	2	1e-05	2592	50000	0.05184
GT	RUTH-LRT	0.01	2	0.01	5	2	1e-06	1022	50000	0.02044
GT	RUTH-LRT	0.01	2	0.01	5	2	1e-07	404	50000	0.00808
GT	RUTH-LRT	0.01	2	0.01	5	2	1e-08	157	50000	0.00314
GT	RUTH-LRT	0.01	2	-0.02	30	2	0.05	18069	50000	0.36138
GT	RUTH-LRT	0.01	2	-0.02	30	2	0.01	8368	50000	0.16736
GT	RUTH-LRT	0.01	2	-0.02	30	2	0.001	2283	50000	0.04566
GT	RUTH-LRT	0.01	2	-0.02	30	2	0.0001	570	50000	0.0114
GT	RUTH-LRT	0.01	2	-0.02	30	2	1e-05	132	50000	0.00264
GT	RUTH-LRT	0.01	2	-0.02	30	2	1e-06	22	50000	0.00044
GT	RUTH-LRT	0.01	2	-0.02	30	2	1e-07	4	50000	8e-05
GT	RUTH-LRT	0.01	2	-0.02	30	2	1e-08	0	50000	0
GL	RUTH-LRT	0.01	2	-0.01	5	2	0.05	2804	50000	0.05608
GL	RUTH-LRT	0.01	2	-0.01	5	2	0.01	563	50000	0.01126
GL	RUTH-LRT	0.01	2	-0.01	5	2	0.001	66	50000	0.00132
GL	RUTH-LRT	0.01	2	-0.01	5	2	0.0001	5	50000	0.0001
GL	RUTH-LRT	0.01	2	-0.01	5	2	1e-05	0	50000	0
GL	RUTH-LRT	0.01	2	-0.01	5	2	1e-06	0	50000	0
GL	RUTH-LRT	0.01	2	-0.01	5	2	1e-07	0	50000	0
GL	RUTH-LRT	0.01	2	-0.01	5	2	1e-08	0	50000	0
GL	RUTH-LRT	0.01	2	0.01	5	2	0.05	5497	50000	0.10994
GL	RUTH-LRT	0.01	2	0.01	5	2	0.01	1615	50000	0.0323
GL	RUTH-LRT	0.01	2	0.01	5	2	0.001	284	50000	0.00568
GL	RUTH-LRT	0.01	2	0.01	5	2	0.0001	44	50000	0.00088
GL	RUTH-LRT	0.01	2	0.01	5	2	1e-05	5	50000	0.0001
GL	RUTH-LRT	0.01	2	0.01	5	2	1e-06	0	50000	0
GL	RUTH-LRT	0.01	2	0.01	5	2	1e-07	0	50000	0
GL	RUTH-LRT	0.01	2	0.01	5	2	1e-08	0	50000	0
GT	RUTH-Score	0.01	2	-0.01	5	2	0.05	22573	50000	0.45146
GT	RUTH-Score	0.01	2	-0.01	5	2	0.01	12958	50000	0.25916
GT	RUTH-Score	0.01	2	-0.01	5	2	0.001	5509	50000	0.11018
GT	RUTH-Score	0.01	2	-0.01	5	2	0.0001	2138	50000	0.04276
GT	RUTH-Score	0.01	2	-0.01	5	2	1e-05	823	50000	0.01646
GT	RUTH-Score	0.01	2	-0.01	5	2	1e-06	346	50000	0.00692
GT	RUTH-Score	0.01	2	-0.01	5	2	1e-07	141	50000	0.00282
GT	RUTH-Score	0.01	2	-0.01	5	2	1e-08	71	50000	0.00142
GT	RUTH-Score	0.01	2	0.01	5	2	0.05	27034	50000	0.54068
GT	RUTH-Score	0.01	2	0.01	5	2	0.01	19529	50000	0.39058
GT	RUTH-Score	0.01	2	0.01	5	2	0.001	10991	50000	0.21982
GT	RUTH-Score	0.01	2	0.01	5	2	0.0001	5389	50000	0.10778
GT	RUTH-Score	0.01	2	0.01	5	2	1e-05	2414	50000	0.04828
GT	RUTH-Score	0.01	2	0.01	5	2	1e-06	907	50000	0.01814
GT	RUTH-Score	0.01	2	0.01	5	2	1e-07	344	50000	0.00688
GT	RUTH-Score	0.01	2	0.01	5	2	1e-08	132	50000	0.00264
GL	RUTH-Score	0.01	2	-0.01	5	2	0.05	2882	50000	0.05764
GL	RUTH-Score	0.01	2	-0.01	5	2	0.01	647	50000	0.01294
GL	RUTH-Score	0.01	2	-0.01	5	2	0.001	105	50000	0.0021
GL	RUTH-Score	0.01	2	-0.01	5	2	0.0001	15	50000	0.0003
GL	RUTH-Score	0.01	2	-0.01	5	2	1e-05	1	50000	2e-05
GL	RUTH-Score	0.01	2	-0.01	5	2	1e-06	0	50000	0
GL	RUTH-Score	0.01	2	-0.01	5	2	1e-07	0	50000	0
GL	RUTH-Score	0.01	2	-0.01	5	2	1e-08	0	50000	0
GL	RUTH-Score	0.01	2	0.01	5	2	0.05	4886	50000	0.09772
GL	RUTH-Score	0.01	2	0.01	5	2	0.01	1321	50000	0.02642
GL	RUTH-Score	0.01	2	0.01	5	2	0.001	204	50000	0.00408
GL	RUTH-Score	0.01	2	0.01	5	2	0.0001	32	50000	0.00064
GL	RUTH-Score	0.01	2	0.01	5	2	1e-05	3	50000	6e-05
GL	RUTH-Score	0.01	2	0.01	5	2	1e-06	0	50000	0
GL	RUTH-Score	0.01	2	0.01	5	2	1e-07	0	50000	0
GL	RUTH-Score	0.01	2	0.01	5	2	1e-08	0	50000	0
GT	RUTH-LRT	0.01	2	0.02	30	2	0.05	9145	50000	0.1829
GT	RUTH-LRT	0.01	2	0.02	30	2	0.01	3327	50000	0.06654
GT	RUTH-LRT	0.01	2	0.02	30	2	0.001	708	50000	0.01416
GT	RUTH-LRT	0.01	2	0.02	30	2	0.0001	170	50000	0.0034
GT	RUTH-LRT	0.01	2	0.02	30	2	1e-05	33	50000	0.00066
GT	RUTH-LRT	0.01	2	0.02	30	2	1e-06	8	50000	0.00016
GT	RUTH-LRT	0.01	2	0.02	30	2	1e-07	0	50000	0
GT	RUTH-LRT	0.01	2	0.02	30	2	1e-08	0	50000	0
GT	RUTH-LRT	0.01	2	-0.02	5	2	0.05	19814	50000	0.39628
GT	RUTH-LRT	0.01	2	-0.02	5	2	0.01	10696	50000	0.21392
GT	RUTH-LRT	0.01	2	-0.02	5	2	0.001	3968	50000	0.07936
GT	RUTH-LRT	0.01	2	-0.02	5	2	0.0001	1330	50000	0.0266
GT	RUTH-LRT	0.01	2	-0.02	5	2	1e-05	502	50000	0.01004
GT	RUTH-LRT	0.01	2	-0.02	5	2	1e-06	200	50000	0.004
GT	RUTH-LRT	0.01	2	-0.02	5	2	1e-07	87	50000	0.00174
GT	RUTH-LRT	0.01	2	-0.02	5	2	1e-08	37	50000	0.00074
GL	RUTH-LRT	0.01	2	-0.02	30	2	0.05	13406	50000	0.26812
GL	RUTH-LRT	0.01	2	-0.02	30	2	0.01	5290	50000	0.1058
GL	RUTH-LRT	0.01	2	-0.02	30	2	0.001	1198	50000	0.02396
GL	RUTH-LRT	0.01	2	-0.02	30	2	0.0001	251	50000	0.00502
GL	RUTH-LRT	0.01	2	-0.02	30	2	1e-05	57	50000	0.00114
GL	RUTH-LRT	0.01	2	-0.02	30	2	1e-06	8	50000	0.00016
GL	RUTH-LRT	0.01	2	-0.02	30	2	1e-07	0	50000	0
GL	RUTH-LRT	0.01	2	-0.02	30	2	1e-08	0	50000	0
GL	RUTH-LRT	0.01	2	0.02	30	2	0.05	13282	50000	0.26564
GL	RUTH-LRT	0.01	2	0.02	30	2	0.01	5541	50000	0.11082
GL	RUTH-LRT	0.01	2	0.02	30	2	0.001	1335	50000	0.0267
GL	RUTH-LRT	0.01	2	0.02	30	2	0.0001	315	50000	0.0063
GL	RUTH-LRT	0.01	2	0.02	30	2	1e-05	63	50000	0.00126
GL	RUTH-LRT	0.01	2	0.02	30	2	1e-06	18	50000	0.00036
GL	RUTH-LRT	0.01	2	0.02	30	2	1e-07	1	50000	2e-05
GL	RUTH-LRT	0.01	2	0.02	30	2	1e-08	0	50000	0
GT	RUTH-Score	0.01	2	-0.02	30	2	0.05	18916	50000	0.37832
GT	RUTH-Score	0.01	2	-0.02	30	2	0.01	9721	50000	0.19442
GT	RUTH-Score	0.01	2	-0.02	30	2	0.001	3446	50000	0.06892
GT	RUTH-Score	0.01	2	-0.02	30	2	0.0001	1270	50000	0.0254
GT	RUTH-Score	0.01	2	-0.02	30	2	1e-05	442	50000	0.00884
GT	RUTH-Score	0.01	2	-0.02	30	2	1e-06	157	50000	0.00314
GT	RUTH-Score	0.01	2	-0.02	30	2	1e-07	68	50000	0.00136
GT	RUTH-Score	0.01	2	-0.02	30	2	1e-08	27	50000	0.00054
GT	RUTH-Score	0.01	2	0.02	30	2	0.05	8453	50000	0.16906
GT	RUTH-Score	0.01	2	0.02	30	2	0.01	2945	50000	0.0589
GT	RUTH-Score	0.01	2	0.02	30	2	0.001	603	50000	0.01206
GT	RUTH-Score	0.01	2	0.02	30	2	0.0001	137	50000	0.00274
GT	RUTH-Score	0.01	2	0.02	30	2	1e-05	27	50000	0.00054
GT	RUTH-Score	0.01	2	0.02	30	2	1e-06	5	50000	0.0001
GT	RUTH-Score	0.01	2	0.02	30	2	1e-07	0	50000	0
GT	RUTH-Score	0.01	2	0.02	30	2	1e-08	0	50000	0
GL	RUTH-Score	0.01	2	-0.02	30	2	0.05	14301	50000	0.28602
GL	RUTH-Score	0.01	2	-0.02	30	2	0.01	6311	50000	0.12622
GL	RUTH-Score	0.01	2	-0.02	30	2	0.001	1853	50000	0.03706
GL	RUTH-Score	0.01	2	-0.02	30	2	0.0001	552	50000	0.01104
GL	RUTH-Score	0.01	2	-0.02	30	2	1e-05	176	50000	0.00352
GL	RUTH-Score	0.01	2	-0.02	30	2	1e-06	54	50000	0.00108
GL	RUTH-Score	0.01	2	-0.02	30	2	1e-07	19	50000	0.00038
GL	RUTH-Score	0.01	2	-0.02	30	2	1e-08	11	50000	0.00022
GL	RUTH-Score	0.01	2	0.02	30	2	0.05	11706	50000	0.23412
GL	RUTH-Score	0.01	2	0.02	30	2	0.01	4399	50000	0.08798
GL	RUTH-Score	0.01	2	0.02	30	2	0.001	925	50000	0.0185
GL	RUTH-Score	0.01	2	0.02	30	2	0.0001	204	50000	0.00408
GL	RUTH-Score	0.01	2	0.02	30	2	1e-05	36	50000	0.00072
GL	RUTH-Score	0.01	2	0.02	30	2	1e-06	9	50000	0.00018
GL	RUTH-Score	0.01	2	0.02	30	2	1e-07	0	50000	0
GL	RUTH-Score	0.01	2	0.02	30	2	1e-08	0	50000	0
GT	RUTH-LRT	0.01	2	0.02	5	2	0.05	28474	50000	0.56948
GT	RUTH-LRT	0.01	2	0.02	5	2	0.01	23260	50000	0.4652
GT	RUTH-LRT	0.01	2	0.02	5	2	0.001	16143	50000	0.32286
GT	RUTH-LRT	0.01	2	0.02	5	2	0.0001	9918	50000	0.19836
GT	RUTH-LRT	0.01	2	0.02	5	2	1e-05	5456	50000	0.10912
GT	RUTH-LRT	0.01	2	0.02	5	2	1e-06	2729	50000	0.05458
GT	RUTH-LRT	0.01	2	0.02	5	2	1e-07	1275	50000	0.0255
GT	RUTH-LRT	0.01	2	0.02	5	2	1e-08	551	50000	0.01102
GT	RUTH-LRT	0.01	2	-0.05	30	2	0.05	45931	50000	0.91862
GT	RUTH-LRT	0.01	2	-0.05	30	2	0.01	41141	50000	0.82282
GT	RUTH-LRT	0.01	2	-0.05	30	2	0.001	30855	50000	0.6171
GT	RUTH-LRT	0.01	2	-0.05	30	2	0.0001	19889	50000	0.39778
GT	RUTH-LRT	0.01	2	-0.05	30	2	1e-05	11063	50000	0.22126
GT	RUTH-LRT	0.01	2	-0.05	30	2	1e-06	5299	50000	0.10598
GT	RUTH-LRT	0.01	2	-0.05	30	2	1e-07	2220	50000	0.0444
GT	RUTH-LRT	0.01	2	-0.05	30	2	1e-08	851	50000	0.01702
GL	RUTH-LRT	0.01	2	-0.02	5	2	0.05	6159	50000	0.12318
GL	RUTH-LRT	0.01	2	-0.02	5	2	0.01	1833	50000	0.03666
GL	RUTH-LRT	0.01	2	-0.02	5	2	0.001	320	50000	0.0064
GL	RUTH-LRT	0.01	2	-0.02	5	2	0.0001	47	50000	0.00094
GL	RUTH-LRT	0.01	2	-0.02	5	2	1e-05	5	50000	0.0001
GL	RUTH-LRT	0.01	2	-0.02	5	2	1e-06	3	50000	6e-05
GL	RUTH-LRT	0.01	2	-0.02	5	2	1e-07	0	50000	0
GL	RUTH-LRT	0.01	2	-0.02	5	2	1e-08	0	50000	0
GL	RUTH-LRT	0.01	2	0.02	5	2	0.05	11931	50000	0.23862
GL	RUTH-LRT	0.01	2	0.02	5	2	0.01	4783	50000	0.09566
GL	RUTH-LRT	0.01	2	0.02	5	2	0.001	1094	50000	0.02188
GL	RUTH-LRT	0.01	2	0.02	5	2	0.0001	214	50000	0.00428
GL	RUTH-LRT	0.01	2	0.02	5	2	1e-05	46	50000	0.00092
GL	RUTH-LRT	0.01	2	0.02	5	2	1e-06	8	50000	0.00016
GL	RUTH-LRT	0.01	2	0.02	5	2	1e-07	3	50000	6e-05
GL	RUTH-LRT	0.01	2	0.02	5	2	1e-08	0	50000	0
GT	RUTH-Score	0.01	2	-0.02	5	2	0.05	20281	50000	0.40562
GT	RUTH-Score	0.01	2	-0.02	5	2	0.01	11808	50000	0.23616
GT	RUTH-Score	0.01	2	-0.02	5	2	0.001	5448	50000	0.10896
GT	RUTH-Score	0.01	2	-0.02	5	2	0.0001	2509	50000	0.05018
GT	RUTH-Score	0.01	2	-0.02	5	2	1e-05	1275	50000	0.0255
GT	RUTH-Score	0.01	2	-0.02	5	2	1e-06	650	50000	0.013
GT	RUTH-Score	0.01	2	-0.02	5	2	1e-07	312	50000	0.00624
GT	RUTH-Score	0.01	2	-0.02	5	2	1e-08	148	50000	0.00296
GT	RUTH-Score	0.01	2	0.02	5	2	0.05	28546	50000	0.57092
GT	RUTH-Score	0.01	2	0.02	5	2	0.01	23266	50000	0.46532
GT	RUTH-Score	0.01	2	0.02	5	2	0.001	15800	50000	0.316
GT	RUTH-Score	0.01	2	0.02	5	2	0.0001	9417	50000	0.18834
GT	RUTH-Score	0.01	2	0.02	5	2	1e-05	5049	50000	0.10098
GT	RUTH-Score	0.01	2	0.02	5	2	1e-06	2473	50000	0.04946
GT	RUTH-Score	0.01	2	0.02	5	2	1e-07	1128	50000	0.02256
GT	RUTH-Score	0.01	2	0.02	5	2	1e-08	473	50000	0.00946
GL	RUTH-Score	0.01	2	-0.02	5	2	0.05	6438	50000	0.12876
GL	RUTH-Score	0.01	2	-0.02	5	2	0.01	2090	50000	0.0418
GL	RUTH-Score	0.01	2	-0.02	5	2	0.001	415	50000	0.0083
GL	RUTH-Score	0.01	2	-0.02	5	2	0.0001	87	50000	0.00174
GL	RUTH-Score	0.01	2	-0.02	5	2	1e-05	16	50000	0.00032
GL	RUTH-Score	0.01	2	-0.02	5	2	1e-06	5	50000	0.0001
GL	RUTH-Score	0.01	2	-0.02	5	2	1e-07	0	50000	0
GL	RUTH-Score	0.01	2	-0.02	5	2	1e-08	0	50000	0
GL	RUTH-Score	0.01	2	0.02	5	2	0.05	10735	50000	0.2147
GL	RUTH-Score	0.01	2	0.02	5	2	0.01	4094	50000	0.08188
GL	RUTH-Score	0.01	2	0.02	5	2	0.001	872	50000	0.01744
GL	RUTH-Score	0.01	2	0.02	5	2	0.0001	166	50000	0.00332
GL	RUTH-Score	0.01	2	0.02	5	2	1e-05	29	50000	0.00058
GL	RUTH-Score	0.01	2	0.02	5	2	1e-06	5	50000	0.0001
GL	RUTH-Score	0.01	2	0.02	5	2	1e-07	2	50000	4e-05
GL	RUTH-Score	0.01	2	0.02	5	2	1e-08	0	50000	0
GT	RUTH-LRT	0.01	2	0.05	30	2	0.05	39803	50000	0.79606
GT	RUTH-LRT	0.01	2	0.05	30	2	0.01	31107	50000	0.62214
GT	RUTH-LRT	0.01	2	0.05	30	2	0.001	18743	50000	0.37486
GT	RUTH-LRT	0.01	2	0.05	30	2	0.0001	9857	50000	0.19714
GT	RUTH-LRT	0.01	2	0.05	30	2	1e-05	4498	50000	0.08996
GT	RUTH-LRT	0.01	2	0.05	30	2	1e-06	1816	50000	0.03632
GT	RUTH-LRT	0.01	2	0.05	30	2	1e-07	705	50000	0.0141
GT	RUTH-LRT	0.01	2	0.05	30	2	1e-08	249	50000	0.00498
GT	RUTH-LRT	0.01	2	-0.05	5	2	0.05	19246	50000	0.38492
GT	RUTH-LRT	0.01	2	-0.05	5	2	0.01	14956	50000	0.29912
GT	RUTH-LRT	0.01	2	-0.05	5	2	0.001	10255	50000	0.2051
GT	RUTH-LRT	0.01	2	-0.05	5	2	0.0001	6159	50000	0.12318
GT	RUTH-LRT	0.01	2	-0.05	5	2	1e-05	3348	50000	0.06696
GT	RUTH-LRT	0.01	2	-0.05	5	2	1e-06	1676	50000	0.03352
GT	RUTH-LRT	0.01	2	-0.05	5	2	1e-07	852	50000	0.01704
GT	RUTH-LRT	0.01	2	-0.05	5	2	1e-08	430	50000	0.0086
GL	RUTH-LRT	0.01	2	-0.05	30	2	0.05	45125	50000	0.9025
GL	RUTH-LRT	0.01	2	-0.05	30	2	0.01	39143	50000	0.78286
GL	RUTH-LRT	0.01	2	-0.05	30	2	0.001	27433	50000	0.54866
GL	RUTH-LRT	0.01	2	-0.05	30	2	0.0001	15933	50000	0.31866
GL	RUTH-LRT	0.01	2	-0.05	30	2	1e-05	7783	50000	0.15566
GL	RUTH-LRT	0.01	2	-0.05	30	2	1e-06	3253	50000	0.06506
GL	RUTH-LRT	0.01	2	-0.05	30	2	1e-07	1230	50000	0.0246
GL	RUTH-LRT	0.01	2	-0.05	30	2	1e-08	447	50000	0.00894
GL	RUTH-LRT	0.01	2	0.05	30	2	0.05	44341	50000	0.88682
GL	RUTH-LRT	0.01	2	0.05	30	2	0.01	37304	50000	0.74608
GL	RUTH-LRT	0.01	2	0.05	30	2	0.001	25021	50000	0.50042
GL	RUTH-LRT	0.01	2	0.05	30	2	0.0001	14308	50000	0.28616
GL	RUTH-LRT	0.01	2	0.05	30	2	1e-05	7203	50000	0.14406
GL	RUTH-LRT	0.01	2	0.05	30	2	1e-06	3174	50000	0.06348
GL	RUTH-LRT	0.01	2	0.05	30	2	1e-07	1257	50000	0.02514
GL	RUTH-LRT	0.01	2	0.05	30	2	1e-08	474	50000	0.00948
GT	RUTH-Score	0.01	2	-0.05	30	2	0.05	45840	50000	0.9168
GT	RUTH-Score	0.01	2	-0.05	30	2	0.01	41633	50000	0.83266
GT	RUTH-Score	0.01	2	-0.05	30	2	0.001	32766	50000	0.65532
GT	RUTH-Score	0.01	2	-0.05	30	2	0.0001	23409	50000	0.46818
GT	RUTH-Score	0.01	2	-0.05	30	2	1e-05	15718	50000	0.31436
GT	RUTH-Score	0.01	2	-0.05	30	2	1e-06	10071	50000	0.20142
GT	RUTH-Score	0.01	2	-0.05	30	2	1e-07	6535	50000	0.1307
GT	RUTH-Score	0.01	2	-0.05	30	2	1e-08	4237	50000	0.08474
GT	RUTH-Score	0.01	2	0.05	30	2	0.05	37866	50000	0.75732
GT	RUTH-Score	0.01	2	0.05	30	2	0.01	28677	50000	0.57354
GT	RUTH-Score	0.01	2	0.05	30	2	0.001	16484	50000	0.32968
GT	RUTH-Score	0.01	2	0.05	30	2	0.0001	8316	50000	0.16632
GT	RUTH-Score	0.01	2	0.05	30	2	1e-05	3688	50000	0.07376
GT	RUTH-Score	0.01	2	0.05	30	2	1e-06	1425	50000	0.0285
GT	RUTH-Score	0.01	2	0.05	30	2	1e-07	509	50000	0.01018
GT	RUTH-Score	0.01	2	0.05	30	2	1e-08	184	50000	0.00368
GL	RUTH-Score	0.01	2	-0.05	30	2	0.05	45268	50000	0.90536
GL	RUTH-Score	0.01	2	-0.05	30	2	0.01	40112	50000	0.80224
GL	RUTH-Score	0.01	2	-0.05	30	2	0.001	30032	50000	0.60064
GL	RUTH-Score	0.01	2	-0.05	30	2	0.0001	20000	50000	0.4
GL	RUTH-Score	0.01	2	-0.05	30	2	1e-05	12318	50000	0.24636
GL	RUTH-Score	0.01	2	-0.05	30	2	1e-06	7238	50000	0.14476
GL	RUTH-Score	0.01	2	-0.05	30	2	1e-07	4311	50000	0.08622
GL	RUTH-Score	0.01	2	-0.05	30	2	1e-08	2637	50000	0.05274
GL	RUTH-Score	0.01	2	0.05	30	2	0.05	42195	50000	0.8439
GL	RUTH-Score	0.01	2	0.05	30	2	0.01	34019	50000	0.68038
GL	RUTH-Score	0.01	2	0.05	30	2	0.001	21209	50000	0.42418
GL	RUTH-Score	0.01	2	0.05	30	2	0.0001	11271	50000	0.22542
GL	RUTH-Score	0.01	2	0.05	30	2	1e-05	5201	50000	0.10402
GL	RUTH-Score	0.01	2	0.05	30	2	1e-06	2078	50000	0.04156
GL	RUTH-Score	0.01	2	0.05	30	2	1e-07	779	50000	0.01558
GL	RUTH-Score	0.01	2	0.05	30	2	1e-08	278	50000	0.00556
GT	RUTH-LRT	0.01	2	0.05	5	2	0.05	31888	50000	0.63776
GT	RUTH-LRT	0.01	2	0.05	5	2	0.01	29622	50000	0.59244
GT	RUTH-LRT	0.01	2	0.05	5	2	0.001	27073	50000	0.54146
GT	RUTH-LRT	0.01	2	0.05	5	2	0.0001	23830	50000	0.4766
GT	RUTH-LRT	0.01	2	0.05	5	2	1e-05	19555	50000	0.3911
GT	RUTH-LRT	0.01	2	0.05	5	2	1e-06	14801	50000	0.29602
GT	RUTH-LRT	0.01	2	0.05	5	2	1e-07	10472	50000	0.20944
GT	RUTH-LRT	0.01	2	0.05	5	2	1e-08	6876	50000	0.13752
GT	RUTH-LRT	0.01	2	0	30	2	0.05	3194	50000	0.06388
GT	RUTH-LRT	0.01	2	0	30	2	0.01	730	50000	0.0146
GT	RUTH-LRT	0.01	2	0	30	2	0.001	97	50000	0.00194
GT	RUTH-LRT	0.01	2	0	30	2	0.0001	8	50000	0.00016
GT	RUTH-LRT	0.01	2	0	30	2	1e-05	2	50000	4e-05
GT	RUTH-LRT	0.01	2	0	30	2	1e-06	0	50000	0
GT	RUTH-LRT	0.01	2	0	30	2	1e-07	0	50000	0
GT	RUTH-LRT	0.01	2	0	30	2	1e-08	0	50000	0
GL	RUTH-LRT	0.01	2	-0.05	5	2	0.05	32664	50000	0.65328
GL	RUTH-LRT	0.01	2	-0.05	5	2	0.01	21110	50000	0.4222
GL	RUTH-LRT	0.01	2	-0.05	5	2	0.001	9058	50000	0.18116
GL	RUTH-LRT	0.01	2	-0.05	5	2	0.0001	3260	50000	0.0652
GL	RUTH-LRT	0.01	2	-0.05	5	2	1e-05	1066	50000	0.02132
GL	RUTH-LRT	0.01	2	-0.05	5	2	1e-06	321	50000	0.00642
GL	RUTH-LRT	0.01	2	-0.05	5	2	1e-07	97	50000	0.00194
GL	RUTH-LRT	0.01	2	-0.05	5	2	1e-08	22	50000	0.00044
GL	RUTH-LRT	0.01	2	0.05	5	2	0.05	37924	50000	0.75848
GL	RUTH-LRT	0.01	2	0.05	5	2	0.01	28296	50000	0.56592
GL	RUTH-LRT	0.01	2	0.05	5	2	0.001	15588	50000	0.31176
GL	RUTH-LRT	0.01	2	0.05	5	2	0.0001	7340	50000	0.1468
GL	RUTH-LRT	0.01	2	0.05	5	2	1e-05	3054	50000	0.06108
GL	RUTH-LRT	0.01	2	0.05	5	2	1e-06	1136	50000	0.02272
GL	RUTH-LRT	0.01	2	0.05	5	2	1e-07	381	50000	0.00762
GL	RUTH-LRT	0.01	2	0.05	5	2	1e-08	114	50000	0.00228
GT	RUTH-Score	0.01	2	-0.05	5	2	0.05	19353	50000	0.38706
GT	RUTH-Score	0.01	2	-0.05	5	2	0.01	15807	50000	0.31614
GT	RUTH-Score	0.01	2	-0.05	5	2	0.001	12367	50000	0.24734
GT	RUTH-Score	0.01	2	-0.05	5	2	0.0001	9257	50000	0.18514
GT	RUTH-Score	0.01	2	-0.05	5	2	1e-05	6683	50000	0.13366
GT	RUTH-Score	0.01	2	-0.05	5	2	1e-06	4662	50000	0.09324
GT	RUTH-Score	0.01	2	-0.05	5	2	1e-07	3105	50000	0.0621
GT	RUTH-Score	0.01	2	-0.05	5	2	1e-08	2041	50000	0.04082
GT	RUTH-Score	0.01	2	0.05	5	2	0.05	31478	50000	0.62956
GT	RUTH-Score	0.01	2	0.05	5	2	0.01	29253	50000	0.58506
GT	RUTH-Score	0.01	2	0.05	5	2	0.001	26634	50000	0.53268
GT	RUTH-Score	0.01	2	0.05	5	2	0.0001	23141	50000	0.46282
GT	RUTH-Score	0.01	2	0.05	5	2	1e-05	18599	50000	0.37198
GT	RUTH-Score	0.01	2	0.05	5	2	1e-06	13736	50000	0.27472
GT	RUTH-Score	0.01	2	0.05	5	2	1e-07	9489	50000	0.18978
GT	RUTH-Score	0.01	2	0.05	5	2	1e-08	6101	50000	0.12202
GL	RUTH-Score	0.01	2	-0.05	5	2	0.05	33161	50000	0.66322
GL	RUTH-Score	0.01	2	-0.05	5	2	0.01	22358	50000	0.44716
GL	RUTH-Score	0.01	2	-0.05	5	2	0.001	10496	50000	0.20992
GL	RUTH-Score	0.01	2	-0.05	5	2	0.0001	4237	50000	0.08474
GL	RUTH-Score	0.01	2	-0.05	5	2	1e-05	1594	50000	0.03188
GL	RUTH-Score	0.01	2	-0.05	5	2	1e-06	554	50000	0.01108
GL	RUTH-Score	0.01	2	-0.05	5	2	1e-07	188	50000	0.00376
GL	RUTH-Score	0.01	2	-0.05	5	2	1e-08	72	50000	0.00144
GL	RUTH-Score	0.01	2	0.05	5	2	0.05	35733	50000	0.71466
GL	RUTH-Score	0.01	2	0.05	5	2	0.01	25687	50000	0.51374
GL	RUTH-Score	0.01	2	0.05	5	2	0.001	13510	50000	0.2702
GL	RUTH-Score	0.01	2	0.05	5	2	0.0001	5999	50000	0.11998
GL	RUTH-Score	0.01	2	0.05	5	2	1e-05	2372	50000	0.04744
GL	RUTH-Score	0.01	2	0.05	5	2	1e-06	843	50000	0.01686
GL	RUTH-Score	0.01	2	0.05	5	2	1e-07	277	50000	0.00554
GL	RUTH-Score	0.01	2	0.05	5	2	1e-08	83	50000	0.00166
GT	RUTH-LRT	0.01	2	0	5	2	0.05	24406	50000	0.48812
GT	RUTH-LRT	0.01	2	0	5	2	0.01	15231	50000	0.30462
GT	RUTH-LRT	0.01	2	0	5	2	0.001	6961	50000	0.13922
GT	RUTH-LRT	0.01	2	0	5	2	0.0001	2811	50000	0.05622
GT	RUTH-LRT	0.01	2	0	5	2	1e-05	982	50000	0.01964
GT	RUTH-LRT	0.01	2	0	5	2	1e-06	356	50000	0.00712
GT	RUTH-LRT	0.01	2	0	5	2	1e-07	118	50000	0.00236
GT	RUTH-LRT	0.01	2	0	5	2	1e-08	36	50000	0.00072
GL	RUTH-LRT	0.01	2	0	30	2	0.05	2496	50000	0.04992
GL	RUTH-LRT	0.01	2	0	30	2	0.01	537	50000	0.01074
GL	RUTH-LRT	0.01	2	0	30	2	0.001	50	50000	0.001
GL	RUTH-LRT	0.01	2	0	30	2	0.0001	4	50000	8e-05
GL	RUTH-LRT	0.01	2	0	30	2	1e-05	0	50000	0
GL	RUTH-LRT	0.01	2	0	30	2	1e-06	0	50000	0
GL	RUTH-LRT	0.01	2	0	30	2	1e-07	0	50000	0
GL	RUTH-LRT	0.01	2	0	30	2	1e-08	0	50000	0
GT	RUTH-Score	0.01	2	0	30	2	0.05	3459	50000	0.06918
GT	RUTH-Score	0.01	2	0	30	2	0.01	951	50000	0.01902
GT	RUTH-Score	0.01	2	0	30	2	0.001	191	50000	0.00382
GT	RUTH-Score	0.01	2	0	30	2	0.0001	40	50000	0.0008
GT	RUTH-Score	0.01	2	0	30	2	1e-05	12	50000	0.00024
GT	RUTH-Score	0.01	2	0	30	2	1e-06	1	50000	2e-05
GT	RUTH-Score	0.01	2	0	30	2	1e-07	0	50000	0
GT	RUTH-Score	0.01	2	0	30	2	1e-08	0	50000	0
GL	RUTH-Score	0.01	2	0	30	2	0.05	2440	50000	0.0488
GL	RUTH-Score	0.01	2	0	30	2	0.01	538	50000	0.01076
GL	RUTH-Score	0.01	2	0	30	2	0.001	66	50000	0.00132
GL	RUTH-Score	0.01	2	0	30	2	0.0001	10	50000	0.0002
GL	RUTH-Score	0.01	2	0	30	2	1e-05	0	50000	0
GL	RUTH-Score	0.01	2	0	30	2	1e-06	0	50000	0
GL	RUTH-Score	0.01	2	0	30	2	1e-07	0	50000	0
GL	RUTH-Score	0.01	2	0	30	2	1e-08	0	50000	0
GT	RUTH-LRT	0.01	2	-0.1	30	2	0.05	48005	50000	0.9601
GT	RUTH-LRT	0.01	2	-0.1	30	2	0.01	47378	50000	0.94756
GT	RUTH-LRT	0.01	2	-0.1	30	2	0.001	46663	50000	0.93326
GT	RUTH-LRT	0.01	2	-0.1	30	2	0.0001	46021	50000	0.92042
GT	RUTH-LRT	0.01	2	-0.1	30	2	1e-05	45347	50000	0.90694
GT	RUTH-LRT	0.01	2	-0.1	30	2	1e-06	44435	50000	0.8887
GT	RUTH-LRT	0.01	2	-0.1	30	2	1e-07	42912	50000	0.85824
GT	RUTH-LRT	0.01	2	-0.1	30	2	1e-08	40588	50000	0.81176
GL	RUTH-LRT	0.01	2	0	5	2	0.05	2699	50000	0.05398
GL	RUTH-LRT	0.01	2	0	5	2	0.01	545	50000	0.0109
GL	RUTH-LRT	0.01	2	0	5	2	0.001	49	50000	0.00098
GL	RUTH-LRT	0.01	2	0	5	2	0.0001	4	50000	8e-05
GL	RUTH-LRT	0.01	2	0	5	2	1e-05	0	50000	0
GL	RUTH-LRT	0.01	2	0	5	2	1e-06	0	50000	0
GL	RUTH-LRT	0.01	2	0	5	2	1e-07	0	50000	0
GL	RUTH-LRT	0.01	2	0	5	2	1e-08	0	50000	0
GT	RUTH-Score	0.01	2	0	5	2	0.05	24740	50000	0.4948
GT	RUTH-Score	0.01	2	0	5	2	0.01	15654	50000	0.31308
GT	RUTH-Score	0.01	2	0	5	2	0.001	7245	50000	0.1449
GT	RUTH-Score	0.01	2	0	5	2	0.0001	2949	50000	0.05898
GT	RUTH-Score	0.01	2	0	5	2	1e-05	1110	50000	0.0222
GT	RUTH-Score	0.01	2	0	5	2	1e-06	413	50000	0.00826
GT	RUTH-Score	0.01	2	0	5	2	1e-07	134	50000	0.00268
GT	RUTH-Score	0.01	2	0	5	2	1e-08	46	50000	0.00092
GL	RUTH-Score	0.01	2	0	5	2	0.05	2466	50000	0.04932
GL	RUTH-Score	0.01	2	0	5	2	0.01	479	50000	0.00958
GL	RUTH-Score	0.01	2	0	5	2	0.001	41	50000	0.00082
GL	RUTH-Score	0.01	2	0	5	2	0.0001	8	50000	0.00016
GL	RUTH-Score	0.01	2	0	5	2	1e-05	0	50000	0
GL	RUTH-Score	0.01	2	0	5	2	1e-06	0	50000	0
GL	RUTH-Score	0.01	2	0	5	2	1e-07	0	50000	0
GL	RUTH-Score	0.01	2	0	5	2	1e-08	0	50000	0
GT	RUTH-LRT	0.01	2	0.1	30	2	0.05	49059	50000	0.98118
GT	RUTH-LRT	0.01	2	0.1	30	2	0.01	48549	50000	0.97098
GT	RUTH-LRT	0.01	2	0.1	30	2	0.001	47618	50000	0.95236
GT	RUTH-LRT	0.01	2	0.1	30	2	0.0001	46018	50000	0.92036
GT	RUTH-LRT	0.01	2	0.1	30	2	1e-05	43619	50000	0.87238
GT	RUTH-LRT	0.01	2	0.1	30	2	1e-06	40375	50000	0.8075
GT	RUTH-LRT	0.01	2	0.1	30	2	1e-07	36144	50000	0.72288
GT	RUTH-LRT	0.01	2	0.1	30	2	1e-08	30997	50000	0.61994
GT	RUTH-LRT	0.01	2	-0.1	5	2	0.05	39430	50000	0.7886
GT	RUTH-LRT	0.01	2	-0.1	5	2	0.01	32628	50000	0.65256
GT	RUTH-LRT	0.01	2	-0.1	5	2	0.001	24580	50000	0.4916
GT	RUTH-LRT	0.01	2	-0.1	5	2	0.0001	18946	50000	0.37892
GT	RUTH-LRT	0.01	2	-0.1	5	2	1e-05	15213	50000	0.30426
GT	RUTH-LRT	0.01	2	-0.1	5	2	1e-06	12545	50000	0.2509
GT	RUTH-LRT	0.01	2	-0.1	5	2	1e-07	10136	50000	0.20272
GT	RUTH-LRT	0.01	2	-0.1	5	2	1e-08	7954	50000	0.15908
GL	RUTH-LRT	0.01	2	-0.1	30	2	0.05	47994	50000	0.95988
GL	RUTH-LRT	0.01	2	-0.1	30	2	0.01	47364	50000	0.94728
GL	RUTH-LRT	0.01	2	-0.1	30	2	0.001	46630	50000	0.9326
GL	RUTH-LRT	0.01	2	-0.1	30	2	0.0001	45946	50000	0.91892
GL	RUTH-LRT	0.01	2	-0.1	30	2	1e-05	45238	50000	0.90476
GL	RUTH-LRT	0.01	2	-0.1	30	2	1e-06	44320	50000	0.8864
GL	RUTH-LRT	0.01	2	-0.1	30	2	1e-07	42722	50000	0.85444
GL	RUTH-LRT	0.01	2	-0.1	30	2	1e-08	40170	50000	0.8034
GL	RUTH-LRT	0.01	2	0.1	30	2	0.05	49483	50000	0.98966
GL	RUTH-LRT	0.01	2	0.1	30	2	0.01	49243	50000	0.98486
GL	RUTH-LRT	0.01	2	0.1	30	2	0.001	48731	50000	0.97462
GL	RUTH-LRT	0.01	2	0.1	30	2	0.0001	47977	50000	0.95954
GL	RUTH-LRT	0.01	2	0.1	30	2	1e-05	46678	50000	0.93356
GL	RUTH-LRT	0.01	2	0.1	30	2	1e-06	44623	50000	0.89246
GL	RUTH-LRT	0.01	2	0.1	30	2	1e-07	41413	50000	0.82826
GL	RUTH-LRT	0.01	2	0.1	30	2	1e-08	37138	50000	0.74276
GT	RUTH-Score	0.01	2	-0.1	30	2	0.05	47835	50000	0.9567
GT	RUTH-Score	0.01	2	-0.1	30	2	0.01	47526	50000	0.95052
GT	RUTH-Score	0.01	2	-0.1	30	2	0.001	47170	50000	0.9434
GT	RUTH-Score	0.01	2	-0.1	30	2	0.0001	46817	50000	0.93634
GT	RUTH-Score	0.01	2	-0.1	30	2	1e-05	46457	50000	0.92914
GT	RUTH-Score	0.01	2	-0.1	30	2	1e-06	45895	50000	0.9179
GT	RUTH-Score	0.01	2	-0.1	30	2	1e-07	44771	50000	0.89542
GT	RUTH-Score	0.01	2	-0.1	30	2	1e-08	43032	50000	0.86064
GT	RUTH-Score	0.01	2	0.1	30	2	0.05	47925	50000	0.9585
GT	RUTH-Score	0.01	2	0.1	30	2	0.01	46852	50000	0.93704
GT	RUTH-Score	0.01	2	0.1	30	2	0.001	44822	50000	0.89644
GT	RUTH-Score	0.01	2	0.1	30	2	0.0001	42229	50000	0.84458
GT	RUTH-Score	0.01	2	0.1	30	2	1e-05	39109	50000	0.78218
GT	RUTH-Score	0.01	2	0.1	30	2	1e-06	35255	50000	0.7051
GT	RUTH-Score	0.01	2	0.1	30	2	1e-07	30787	50000	0.61574
GT	RUTH-Score	0.01	2	0.1	30	2	1e-08	25753	50000	0.51506
GL	RUTH-Score	0.01	2	-0.1	30	2	0.05	47889	50000	0.95778
GL	RUTH-Score	0.01	2	-0.1	30	2	0.01	47563	50000	0.95126
GL	RUTH-Score	0.01	2	-0.1	30	2	0.001	47178	50000	0.94356
GL	RUTH-Score	0.01	2	-0.1	30	2	0.0001	46843	50000	0.93686
GL	RUTH-Score	0.01	2	-0.1	30	2	1e-05	46475	50000	0.9295
GL	RUTH-Score	0.01	2	-0.1	30	2	1e-06	45896	50000	0.91792
GL	RUTH-Score	0.01	2	-0.1	30	2	1e-07	44767	50000	0.89534
GL	RUTH-Score	0.01	2	-0.1	30	2	1e-08	42867	50000	0.85734
GL	RUTH-Score	0.01	2	0.1	30	2	0.05	48443	50000	0.96886
GL	RUTH-Score	0.01	2	0.1	30	2	0.01	47552	50000	0.95104
GL	RUTH-Score	0.01	2	0.1	30	2	0.001	46054	50000	0.92108
GL	RUTH-Score	0.01	2	0.1	30	2	0.0001	44217	50000	0.88434
GL	RUTH-Score	0.01	2	0.1	30	2	1e-05	41880	50000	0.8376
GL	RUTH-Score	0.01	2	0.1	30	2	1e-06	38801	50000	0.77602
GL	RUTH-Score	0.01	2	0.1	30	2	1e-07	34792	50000	0.69584
GL	RUTH-Score	0.01	2	0.1	30	2	1e-08	29964	50000	0.59928
GT	RUTH-LRT	0.01	2	0.1	5	2	0.05	41172	50000	0.82344
GT	RUTH-LRT	0.01	2	0.1	5	2	0.01	38202	50000	0.76404
GT	RUTH-LRT	0.01	2	0.1	5	2	0.001	34678	50000	0.69356
GT	RUTH-LRT	0.01	2	0.1	5	2	0.0001	32195	50000	0.6439
GT	RUTH-LRT	0.01	2	0.1	5	2	1e-05	30554	50000	0.61108
GT	RUTH-LRT	0.01	2	0.1	5	2	1e-06	29411	50000	0.58822
GT	RUTH-LRT	0.01	2	0.1	5	2	1e-07	28284	50000	0.56568
[truncated: 13,625 more rows]
